# Supplementary material
Source: publisher site journal article supplement (https://www.spandidos-publications.com/6241/downloadSupplementary)
Supplement: Supplementary file 1 [file downloadSupplementary]

## Sheet: Sheet1
Table SVII. GO and KEGG enrichment analyses of the differentially expressed genes between the high- and low-risk groups.
GO													KEGG
ONTOLOGY	ID	Description	GeneRatio	BgRatio	P-value	P-value adjusted	qvalue	geneID	Count				ONTOLOGY	ID	Description	GeneRatio	BgRatio	P-value	P-value adjusted	qvalue	geneID	Count
BP	GO:0030198	extracellular matrix organization	20/77	393/18862	7.3072e-17	5.60101e-14	4.35131e-14	COL3A1/PDPN/SERPINE1/COL4A1/COL4A2/TGFB2/PTX3/NPNT/FMOD/POSTN/LUM/COL1A1/TTR/THBS1/COL6A2/COL1A2/TIMP1/IBSP/COL5A1/MMP9	20				BP	GO:0030198	extracellular matrix organization	20/77	393/18862	7.3072e-17	5.60101e-14	4.35131e-14	NA/NA/NA/NA/NA/NA/NA/NA/NA/NA/NA/NA/NA/NA/NA/NA/NA/NA/NA/NA	20
BP	GO:0043062	extracellular structure organization	20/77	394/18862	7.67541e-17	5.60101e-14	4.35131e-14	COL3A1/PDPN/SERPINE1/COL4A1/COL4A2/TGFB2/PTX3/NPNT/FMOD/POSTN/LUM/COL1A1/TTR/THBS1/COL6A2/COL1A2/TIMP1/IBSP/COL5A1/MMP9	20				BP	GO:0043062	extracellular structure organization	20/77	394/18862	7.67541e-17	5.60101e-14	4.35131e-14	NA/NA/NA/NA/NA/NA/NA/NA/NA/NA/NA/NA/NA/NA/NA/NA/NA/NA/NA/NA	20
BP	GO:0045229	external encapsulating structure organization	20/77	396/18862	8.465e-17	5.60101e-14	4.35131e-14	COL3A1/PDPN/SERPINE1/COL4A1/COL4A2/TGFB2/PTX3/NPNT/FMOD/POSTN/LUM/COL1A1/TTR/THBS1/COL6A2/COL1A2/TIMP1/IBSP/COL5A1/MMP9	20				BP	GO:0045229	external encapsulating structure organization	20/77	396/18862	8.465e-17	5.60101e-14	4.35131e-14	NA/NA/NA/NA/NA/NA/NA/NA/NA/NA/NA/NA/NA/NA/NA/NA/NA/NA/NA/NA	20
BP	GO:0030199	collagen fibril organization	7/77	54/18862	2.17117e-09	1.07744e-06	8.37042e-07	COL3A1/TGFB2/FMOD/LUM/COL1A1/COL1A2/COL5A1	7				BP	GO:0030199	collagen fibril organization	7/77	54/18862	2.17117e-09	1.07744e-06	8.37042e-07	NA/NA/NA/NA/NA/NA/NA	7
BP	GO:0071560	cellular response to transforming growth factor beta stimulus	10/77	251/18862	7.3063e-08	2.9006e-05	2.25342e-05	COL3A1/VASN/COL4A2/TGFB2/FMOD/POSTN/COL1A1/GDF15/THBS1/COL1A2	10				BP	GO:0071560	cellular response to transforming growth factor beta stimulus	10/77	251/18862	7.3063e-08	2.9006e-05	2.25342e-05	NA/NA/NA/NA/NA/NA/NA/NA/NA/NA	10
BP	GO:0071559	response to transforming growth factor beta	10/77	257/18862	9.11346e-08	3.01504e-05	2.34232e-05	COL3A1/VASN/COL4A2/TGFB2/FMOD/POSTN/COL1A1/GDF15/THBS1/COL1A2	10				BP	GO:0071559	response to transforming growth factor beta	10/77	257/18862	9.11346e-08	3.01504e-05	2.34232e-05	NA/NA/NA/NA/NA/NA/NA/NA/NA/NA	10
BP	GO:0001501	skeletal system development	12/77	486/18862	6.01351e-07	0.000170526	0.000132478	HOXA5/COL3A1/TGFB2/LUM/CHI3L1/COL1A1/LTF/COL1A2/TIMP1/HOXD9/IGF2/MMP9	12				BP	GO:0001501	skeletal system development	12/77	486/18862	6.01351e-07	0.000170526	0.000132478	NA/NA/NA/NA/NA/NA/NA/NA/NA/NA/NA/NA	12
BP	GO:0007596	blood coagulation	10/77	342/18862	1.25835e-06	0.000284684	0.000221165	COL3A1/PDPN/SERPINE1/COL1A1/PLAU/THBS1/SAA1/SERPINA5/COL1A2/PLAT	10				BP	GO:0007596	blood coagulation	10/77	342/18862	1.25835e-06	0.000284684	0.000221165	NA/NA/NA/NA/NA/NA/NA/NA/NA/NA	10
BP	GO:0007599	hemostasis	10/77	346/18862	1.39739e-06	0.000284684	0.000221165	COL3A1/PDPN/SERPINE1/COL1A1/PLAU/THBS1/SAA1/SERPINA5/COL1A2/PLAT	10				BP	GO:0007599	hemostasis	10/77	346/18862	1.39739e-06	0.000284684	0.000221165	NA/NA/NA/NA/NA/NA/NA/NA/NA/NA	10
BP	GO:0050817	coagulation	10/77	347/18862	1.43418e-06	0.000284684	0.000221165	COL3A1/PDPN/SERPINE1/COL1A1/PLAU/THBS1/SAA1/SERPINA5/COL1A2/PLAT	10				BP	GO:0050817	coagulation	10/77	347/18862	1.43418e-06	0.000284684	0.000221165	NA/NA/NA/NA/NA/NA/NA/NA/NA/NA	10
BP	GO:0031639	plasminogen activation	4/77	23/18862	2.14289e-06	0.000384095	0.000298395	SERPINE1/PLAU/THBS1/PLAT	4				BP	GO:0031639	plasminogen activation	4/77	23/18862	2.14289e-06	0.000384095	0.000298395	NA/NA/NA/NA	4
BP	GO:0051346	negative regulation of hydrolase activity	11/77	456/18862	2.32198e-06	0.000384095	0.000298395	SERPINE1/TGFB2/ANXA1/PTX3/LTF/CCDC8/THBS1/SERPINA5/SPOCD1/TIMP1/MMP9	11				BP	GO:0051346	negative regulation of hydrolase activity	11/77	456/18862	2.32198e-06	0.000384095	0.000298395	NA/NA/NA/NA/NA/NA/NA/NA/NA/NA/NA	11
BP	GO:0042730	fibrinolysis	4/77	25/18862	3.04237e-06	0.000464546	0.000360896	SERPINE1/PLAU/THBS1/PLAT	4				BP	GO:0042730	fibrinolysis	4/77	25/18862	3.04237e-06	0.000464546	0.000360896	NA/NA/NA/NA	4
BP	GO:0015909	long-chain fatty acid transport	5/77	72/18862	1.12329e-05	0.00148648	0.00115482	ANXA1/PLA2G2A/PLA2G5/THBS1/FABP5	5				BP	GO:0015909	long-chain fatty acid transport	5/77	72/18862	1.12329e-05	0.00148648	0.00115482	NA/NA/NA/NA/NA	5
BP	GO:0033627	cell adhesion mediated by integrin	5/77	72/18862	1.12329e-05	0.00148648	0.00115482	SERPINE1/TGFB2/NPNT/PLAU/LIF	5				BP	GO:0033627	cell adhesion mediated by integrin	5/77	72/18862	1.12329e-05	0.00148648	0.00115482	NA/NA/NA/NA/NA	5
BP	GO:0038063	collagen-activated tyrosine kinase receptor signaling pathway	3/77	12/18862	1.40146e-05	0.00173869	0.00135075	COL4A1/COL4A2/COL1A1	3				BP	GO:0038063	collagen-activated tyrosine kinase receptor signaling pathway	3/77	12/18862	1.40146e-05	0.00173869	0.00135075	NA/NA/NA	3
BP	GO:0061041	regulation of wound healing	6/77	131/18862	1.58376e-05	0.00184927	0.00143666	SERPINE1/ANXA1/PLAU/THBS1/TNFRSF12A/PLAT	6				BP	GO:0061041	regulation of wound healing	6/77	131/18862	1.58376e-05	0.00184927	0.00143666	NA/NA/NA/NA/NA/NA	6
BP	GO:0007179	transforming growth factor beta receptor signaling pathway	7/77	202/18862	1.8574e-05	0.0019405	0.00150753	COL3A1/VASN/TGFB2/FMOD/GDF15/THBS1/COL1A2	7				BP	GO:0007179	transforming growth factor beta receptor signaling pathway	7/77	202/18862	1.8574e-05	0.0019405	0.00150753	NA/NA/NA/NA/NA/NA/NA	7
BP	GO:0009612	response to mechanical stimulus	7/77	202/18862	1.8574e-05	0.0019405	0.00150753	IGFBP2/COL3A1/POSTN/CHI3L1/COL1A1/THBS1/CXCL10	7				BP	GO:0009612	response to mechanical stimulus	7/77	202/18862	1.8574e-05	0.0019405	0.00150753	NA/NA/NA/NA/NA/NA/NA	7
BP	GO:0006909	phagocytosis	9/77	381/18862	2.44729e-05	0.00236536	0.0018376	IGLV3-21/ANXA1/IGHM/PTX3/IGHA1/PLA2G5/IGHG4/THBS1/MET	9				BP	GO:0006909	phagocytosis	9/77	381/18862	2.44729e-05	0.00236536	0.0018376	NA/NA/NA/NA/NA/NA/NA/NA/NA	9
BP	GO:0019730	antimicrobial humoral response	6/77	142/18862	2.5024e-05	0.00236536	0.0018376	PLA2G2A/IGHM/IGHA1/LTF/CXCL10/JCHAIN	6				BP	GO:0019730	antimicrobial humoral response	6/77	142/18862	2.5024e-05	0.00236536	0.0018376	NA/NA/NA/NA/NA/NA	6
BP	GO:0038065	collagen-activated signaling pathway	3/77	15/18862	2.873e-05	0.00250582	0.00194672	COL4A1/COL4A2/COL1A1	3				BP	GO:0038065	collagen-activated signaling pathway	3/77	15/18862	2.873e-05	0.00250582	0.00194672	NA/NA/NA	3
BP	GO:0016525	negative regulation of angiogenesis	6/77	146/18862	2.9271e-05	0.00250582	0.00194672	HOXA5/SERPINE1/COL4A2/TGFB2/THBS1/CXCL10	6				BP	GO:0016525	negative regulation of angiogenesis	6/77	146/18862	2.9271e-05	0.00250582	0.00194672	NA/NA/NA/NA/NA/NA	6
BP	GO:0010810	regulation of cell-substrate adhesion	7/77	218/18862	3.03009e-05	0.00250582	0.00194672	PDPN/SERPINE1/NPNT/POSTN/COL1A1/PLAU/THBS1	7				BP	GO:0010810	regulation of cell-substrate adhesion	7/77	218/18862	3.03009e-05	0.00250582	0.00194672	NA/NA/NA/NA/NA/NA/NA	7
BP	GO:2000181	negative regulation of blood vessel morphogenesis	6/77	148/18862	3.16017e-05	0.00250582	0.00194672	HOXA5/SERPINE1/COL4A2/TGFB2/THBS1/CXCL10	6				BP	GO:2000181	negative regulation of blood vessel morphogenesis	6/77	148/18862	3.16017e-05	0.00250582	0.00194672	NA/NA/NA/NA/NA/NA	6
BP	GO:1901343	negative regulation of vasculature development	6/77	149/18862	3.28218e-05	0.00250582	0.00194672	HOXA5/SERPINE1/COL4A2/TGFB2/THBS1/CXCL10	6				BP	GO:1901343	negative regulation of vasculature development	6/77	149/18862	3.28218e-05	0.00250582	0.00194672	NA/NA/NA/NA/NA/NA	6
BP	GO:0001503	ossification	9/77	401/18862	3.65071e-05	0.00268394	0.0020851	CTHRC1/TGFB2/NPNT/COL1A1/LTF/COL1A2/IGF2/IBSP/MMP9	9				BP	GO:0001503	ossification	9/77	401/18862	3.65071e-05	0.00268394	0.0020851	NA/NA/NA/NA/NA/NA/NA/NA/NA	9
BP	GO:0030195	negative regulation of blood coagulation	4/77	48/18862	4.35837e-05	0.00298323	0.00231761	SERPINE1/PLAU/THBS1/PLAT	4				BP	GO:0030195	negative regulation of blood coagulation	4/77	48/18862	4.35837e-05	0.00298323	0.00231761	NA/NA/NA/NA	4
BP	GO:0033628	regulation of cell adhesion mediated by integrin	4/77	48/18862	4.35837e-05	0.00298323	0.00231761	SERPINE1/TGFB2/PLAU/LIF	4				BP	GO:0033628	regulation of cell adhesion mediated by integrin	4/77	48/18862	4.35837e-05	0.00298323	0.00231761	NA/NA/NA/NA	4
BP	GO:1900047	negative regulation of hemostasis	4/77	49/18862	4.73115e-05	0.00313044	0.00243197	SERPINE1/PLAU/THBS1/PLAT	4				BP	GO:1900047	negative regulation of hemostasis	4/77	49/18862	4.73115e-05	0.00313044	0.00243197	NA/NA/NA/NA	4
BP	GO:0006910	phagocytosis, recognition	5/77	98/18862	5.02017e-05	0.00321453	0.0024973	IGHM/PTX3/IGHA1/PLA2G5/IGHG4	5				BP	GO:0006910	phagocytosis, recognition	5/77	98/18862	5.02017e-05	0.00321453	0.0024973	NA/NA/NA/NA/NA	5
BP	GO:0071715	icosanoid transport	4/77	51/18862	5.54584e-05	0.00328937	0.00255544	ANXA1/PLA2G2A/PLA2G5/ABCC3	4				BP	GO:0071715	icosanoid transport	4/77	51/18862	5.54584e-05	0.00328937	0.00255544	NA/NA/NA/NA	4
BP	GO:1903034	regulation of response to wounding	6/77	164/18862	5.61337e-05	0.00328937	0.00255544	SERPINE1/ANXA1/PLAU/THBS1/TNFRSF12A/PLAT	6				BP	GO:1903034	regulation of response to wounding	6/77	164/18862	5.61337e-05	0.00328937	0.00255544	NA/NA/NA/NA/NA/NA	6
BP	GO:0045785	positive regulation of cell adhesion	9/77	425/18862	5.72496e-05	0.00328937	0.00255544	IGFBP2/PDPN/TGFB2/ANXA1/NPNT/SAA1/LIF/IGF2/IBSP	9				BP	GO:0045785	positive regulation of cell adhesion	9/77	425/18862	5.72496e-05	0.00328937	0.00255544	NA/NA/NA/NA/NA/NA/NA/NA/NA	9
BP	GO:0014812	muscle cell migration	5/77	101/18862	5.79989e-05	0.00328937	0.00255544	SERPINE1/ANXA1/POSTN/PLAU/PLAT	5				BP	GO:0014812	muscle cell migration	5/77	101/18862	5.79989e-05	0.00328937	0.00255544	NA/NA/NA/NA/NA	5
BP	GO:0050819	negative regulation of coagulation	4/77	52/18862	5.98947e-05	0.00330253	0.00256566	SERPINE1/PLAU/THBS1/PLAT	4				BP	GO:0050819	negative regulation of coagulation	4/77	52/18862	5.98947e-05	0.00330253	0.00256566	NA/NA/NA/NA	4
BP	GO:0010634	positive regulation of epithelial cell migration	6/77	175/18862	8.04566e-05	0.0042028	0.00326507	TGFB2/ANXA1/THBS1/SRPX2/MET/MMP9	6				BP	GO:0010634	positive regulation of epithelial cell migration	6/77	175/18862	8.04566e-05	0.0042028	0.00326507	NA/NA/NA/NA/NA/NA	6
BP	GO:0051897	positive regulation of protein kinase B signaling	6/77	175/18862	8.04566e-05	0.0042028	0.00326507	CHI3L1/GDF15/THBS1/H19/MET/IGF2	6				BP	GO:0051897	positive regulation of protein kinase B signaling	6/77	175/18862	8.04566e-05	0.0042028	0.00326507	NA/NA/NA/NA/NA/NA	6
BP	GO:0031638	zymogen activation	4/77	58/18862	9.21417e-05	0.00468977	0.00364339	SERPINE1/PLAU/THBS1/PLAT	4				BP	GO:0031638	zymogen activation	4/77	58/18862	9.21417e-05	0.00468977	0.00364339	NA/NA/NA/NA	4
BP	GO:0031589	cell-substrate adhesion	8/77	359/18862	0.000106825	0.00530121	0.0041184	COL3A1/PDPN/SERPINE1/NPNT/POSTN/COL1A1/PLAU/THBS1	8				BP	GO:0031589	cell-substrate adhesion	8/77	359/18862	0.000106825	0.00530121	0.0041184	NA/NA/NA/NA/NA/NA/NA/NA	8
BP	GO:0019731	antibacterial humoral response	4/77	61/18862	0.00011229	0.00543649	0.0042235	IGHM/IGHA1/LTF/JCHAIN	4				BP	GO:0019731	antibacterial humoral response	4/77	61/18862	0.00011229	0.00543649	0.0042235	NA/NA/NA/NA	4
BP	GO:0030193	regulation of blood coagulation	4/77	66/18862	0.000152707	0.00698645	0.00542762	SERPINE1/PLAU/THBS1/PLAT	4				BP	GO:0030193	regulation of blood coagulation	4/77	66/18862	0.000152707	0.00698645	0.00542762	NA/NA/NA/NA	4
BP	GO:0071621	granulocyte chemotaxis	5/77	124/18862	0.000153269	0.00698645	0.00542762	TGFB2/ANXA1/THBS1/SAA1/CXCL10	5				BP	GO:0071621	granulocyte chemotaxis	5/77	124/18862	0.000153269	0.00698645	0.00542762	NA/NA/NA/NA/NA	5
BP	GO:0006959	humoral immune response	8/77	380/18862	0.000157889	0.00698645	0.00542762	IGLV3-21/PLA2G2A/IGHM/IGHA1/LTF/IGHG4/CXCL10/JCHAIN	8				BP	GO:0006959	humoral immune response	8/77	380/18862	0.000157889	0.00698645	0.00542762	NA/NA/NA/NA/NA/NA/NA/NA	8
BP	GO:0010812	negative regulation of cell-substrate adhesion	4/77	67/18862	0.000161903	0.00698645	0.00542762	SERPINE1/POSTN/COL1A1/THBS1	4				BP	GO:0010812	negative regulation of cell-substrate adhesion	4/77	67/18862	0.000161903	0.00698645	0.00542762	NA/NA/NA/NA	4
BP	GO:1900046	regulation of hemostasis	4/77	67/18862	0.000161903	0.00698645	0.00542762	SERPINE1/PLAU/THBS1/PLAT	4				BP	GO:1900046	regulation of hemostasis	4/77	67/18862	0.000161903	0.00698645	0.00542762	NA/NA/NA/NA	4
BP	GO:0006026	aminoglycan catabolic process	4/77	68/18862	0.000171492	0.00724279	0.00562677	FMOD/LUM/CHI3L1/CHI3L2	4				BP	GO:0006026	aminoglycan catabolic process	4/77	68/18862	0.000171492	0.00724279	0.00562677	NA/NA/NA/NA	4
BP	GO:0002576	platelet degranulation	5/77	128/18862	0.000177834	0.00735419	0.00571332	SERPINE1/TGFB2/THBS1/TIMP1/IGF2	5				BP	GO:0002576	platelet degranulation	5/77	128/18862	0.000177834	0.00735419	0.00571332	NA/NA/NA/NA/NA	5
BP	GO:0010632	regulation of epithelial cell migration	7/77	293/18862	0.000192976	0.00778015	0.00604423	TGFB2/ANXA1/THBS1/SRPX2/MET/MEOX2/MMP9	7				BP	GO:0010632	regulation of epithelial cell migration	7/77	293/18862	0.000192976	0.00778015	0.00604423	NA/NA/NA/NA/NA/NA/NA	7
BP	GO:0042119	neutrophil activation	9/77	500/18862	0.000195973	0.00778015	0.00604423	PLA2G2A/PTX3/CHI3L1/PLAU/TTR/LTF/TNFAIP6/FABP5/MMP9	9				BP	GO:0042119	neutrophil activation	9/77	500/18862	0.000195973	0.00778015	0.00604423	NA/NA/NA/NA/NA/NA/NA/NA/NA	9
BP	GO:0050818	regulation of coagulation	4/77	71/18862	0.000202721	0.00789022	0.00612975	SERPINE1/PLAU/THBS1/PLAT	4				BP	GO:0050818	regulation of coagulation	4/77	71/18862	0.000202721	0.00789022	0.00612975	NA/NA/NA/NA	4
BP	GO:0050482	arachidonic acid secretion	3/77	29/18862	0.000221425	0.00829298	0.00644264	ANXA1/PLA2G2A/PLA2G5	3				BP	GO:0050482	arachidonic acid secretion	3/77	29/18862	0.000221425	0.00829298	0.00644264	NA/NA/NA	3
BP	GO:1903963	arachidonate transport	3/77	29/18862	0.000221425	0.00829298	0.00644264	ANXA1/PLA2G2A/PLA2G5	3				BP	GO:1903963	arachidonate transport	3/77	29/18862	0.000221425	0.00829298	0.00644264	NA/NA/NA	3
BP	GO:0061045	negative regulation of wound healing	4/77	74/18862	0.000237856	0.00874339	0.00679256	SERPINE1/PLAU/THBS1/PLAT	4				BP	GO:0061045	negative regulation of wound healing	4/77	74/18862	0.000237856	0.00874339	0.00679256	NA/NA/NA/NA	4
BP	GO:0060326	cell chemotaxis	7/77	306/18862	0.000251483	0.00907625	0.00705115	SERPINE1/TGFB2/ANXA1/THBS1/SAA1/MET/CXCL10	7				BP	GO:0060326	cell chemotaxis	7/77	306/18862	0.000251483	0.00907625	0.00705115	NA/NA/NA/NA/NA/NA/NA	7
BP	GO:0097529	myeloid leukocyte migration	6/77	218/18862	0.000266373	0.00929227	0.00721897	SERPINE1/TGFB2/ANXA1/THBS1/SAA1/CXCL10	6				BP	GO:0097529	myeloid leukocyte migration	6/77	218/18862	0.000266373	0.00929227	0.00721897	NA/NA/NA/NA/NA/NA	6
BP	GO:0060562	epithelial tube morphogenesis	7/77	309/18862	0.000266831	0.00929227	0.00721897	HOXA5/COL4A1/CTHRC1/TGFB2/NPNT/MET/CXCL10	7				BP	GO:0060562	epithelial tube morphogenesis	7/77	309/18862	0.000266831	0.00929227	0.00721897	NA/NA/NA/NA/NA/NA/NA	7
BP	GO:0090049	regulation of cell migration involved in sprouting angiogenesis	4/77	77/18862	0.000277172	0.00948598	0.00736946	ANXA1/THBS1/SRPX2/MEOX2	4				BP	GO:0090049	regulation of cell migration involved in sprouting angiogenesis	4/77	77/18862	0.000277172	0.00948598	0.00736946	NA/NA/NA/NA	4
BP	GO:0001649	osteoblast differentiation	6/77	223/18862	0.000300803	0.0101203	0.00786221	CTHRC1/NPNT/COL1A1/LTF/IGF2/IBSP	6				BP	GO:0001649	osteoblast differentiation	6/77	223/18862	0.000300803	0.0101203	0.00786221	NA/NA/NA/NA/NA/NA	6
BP	GO:0007517	muscle organ development	7/77	317/18862	0.00031148	0.0103048	0.00800558	DMRTA2/TGFB2/LIF/MEOX2/HOXD9/IGF2/CXCL10	7				BP	GO:0007517	muscle organ development	7/77	317/18862	0.00031148	0.0103048	0.00800558	NA/NA/NA/NA/NA/NA/NA	7
BP	GO:0030595	leukocyte chemotaxis	6/77	226/18862	0.000323081	0.0105134	0.00816763	SERPINE1/TGFB2/ANXA1/THBS1/SAA1/CXCL10	6				BP	GO:0030595	leukocyte chemotaxis	6/77	226/18862	0.000323081	0.0105134	0.00816763	NA/NA/NA/NA/NA/NA	6
BP	GO:0097530	granulocyte migration	5/77	148/18862	0.000348713	0.01102	0.00856124	TGFB2/ANXA1/THBS1/SAA1/CXCL10	5				BP	GO:0097530	granulocyte migration	5/77	148/18862	0.000348713	0.01102	0.00856124	NA/NA/NA/NA/NA	5
BP	GO:0007160	cell-matrix adhesion	6/77	230/18862	0.000354777	0.01102	0.00856124	COL3A1/SERPINE1/NPNT/POSTN/PLAU/THBS1	6				BP	GO:0007160	cell-matrix adhesion	6/77	230/18862	0.000354777	0.01102	0.00856124	NA/NA/NA/NA/NA/NA	6
BP	GO:0015849	organic acid transport	7/77	324/18862	0.000355306	0.01102	0.00856124	PDPN/ANXA1/PLA2G2A/PLA2G5/ABCC3/THBS1/FABP5	7				BP	GO:0015849	organic acid transport	7/77	324/18862	0.000355306	0.01102	0.00856124	NA/NA/NA/NA/NA/NA/NA	7
BP	GO:0015908	fatty acid transport	5/77	150/18862	0.000370909	0.011327	0.0087997	ANXA1/PLA2G2A/PLA2G5/THBS1/FABP5	5				BP	GO:0015908	fatty acid transport	5/77	150/18862	0.000370909	0.011327	0.0087997	NA/NA/NA/NA/NA	5
BP	GO:0018149	peptide cross-linking	3/77	35/18862	0.000389692	0.0117203	0.00910524	COL3A1/ANXA1/THBS1	3				BP	GO:0018149	peptide cross-linking	3/77	35/18862	0.000389692	0.0117203	0.00910524	NA/NA/NA	3
BP	GO:0045765	regulation of angiogenesis	7/77	335/18862	0.000434061	0.0128599	0.00999055	HOXA5/SERPINE1/COL4A2/TGFB2/CHI3L1/THBS1/CXCL10	7				BP	GO:0045765	regulation of angiogenesis	7/77	335/18862	0.000434061	0.0128599	0.00999055	NA/NA/NA/NA/NA/NA/NA	7
BP	GO:0030168	platelet activation	5/77	157/18862	0.000457101	0.0132822	0.0103187	COL3A1/PDPN/COL1A1/SAA1/COL1A2	5				BP	GO:0030168	platelet activation	5/77	157/18862	0.000457101	0.0132822	0.0103187	NA/NA/NA/NA/NA	5
BP	GO:0014909	smooth muscle cell migration	4/77	88/18862	0.000461698	0.0132822	0.0103187	SERPINE1/POSTN/PLAU/PLAT	4				BP	GO:0014909	smooth muscle cell migration	4/77	88/18862	0.000461698	0.0132822	0.0103187	NA/NA/NA/NA	4
BP	GO:0061448	connective tissue development	6/77	243/18862	0.000474931	0.0134677	0.0104628	HOXA5/LUM/CHI3L1/COL1A1/TIMP1/COL5A1	6				BP	GO:0061448	connective tissue development	6/77	243/18862	0.000474931	0.0134677	0.0104628	NA/NA/NA/NA/NA/NA	6
BP	GO:1901342	regulation of vasculature development	7/77	341/18862	0.000482565	0.0134914	0.0104812	HOXA5/SERPINE1/COL4A2/TGFB2/CHI3L1/THBS1/CXCL10	7				BP	GO:1901342	regulation of vasculature development	7/77	341/18862	0.000482565	0.0134914	0.0104812	NA/NA/NA/NA/NA/NA/NA	7
BP	GO:0010951	negative regulation of endopeptidase activity	6/77	245/18862	0.000495932	0.0136372	0.0105945	SERPINE1/LTF/THBS1/SERPINA5/TIMP1/MMP9	6				BP	GO:0010951	negative regulation of endopeptidase activity	6/77	245/18862	0.000495932	0.0136372	0.0105945	NA/NA/NA/NA/NA/NA	6
BP	GO:1903035	negative regulation of response to wounding	4/77	90/18862	0.000502805	0.0136372	0.0105945	SERPINE1/PLAU/THBS1/PLAT	4				BP	GO:1903035	negative regulation of response to wounding	4/77	90/18862	0.000502805	0.0136372	0.0105945	NA/NA/NA/NA	4
BP	GO:0042742	defense response to bacterium	7/77	344/18862	0.000508391	0.0136372	0.0105945	SERPINE1/PLA2G2A/IGHM/IGHA1/LTF/IGHG4/JCHAIN	7				BP	GO:0042742	defense response to bacterium	7/77	344/18862	0.000508391	0.0136372	0.0105945	NA/NA/NA/NA/NA/NA/NA	7
BP	GO:0051896	regulation of protein kinase B signaling	6/77	247/18862	0.00051765	0.0137005	0.0106436	CHI3L1/GDF15/THBS1/H19/MET/IGF2	6				BP	GO:0051896	regulation of protein kinase B signaling	6/77	247/18862	0.00051765	0.0137005	0.0106436	NA/NA/NA/NA/NA/NA	6
BP	GO:0045861	negative regulation of proteolysis	7/77	346/18862	0.000526213	0.0137439	0.0106773	SERPINE1/LTF/THBS1/SERPINA5/TIMP1/MMP9/PLAT	7				BP	GO:0045861	negative regulation of proteolysis	7/77	346/18862	0.000526213	0.0137439	0.0106773	NA/NA/NA/NA/NA/NA/NA	7
BP	GO:0002042	cell migration involved in sprouting angiogenesis	4/77	93/18862	0.00056926	0.0146751	0.0114008	ANXA1/THBS1/SRPX2/MEOX2	4				BP	GO:0002042	cell migration involved in sprouting angiogenesis	4/77	93/18862	0.00056926	0.0146751	0.0114008	NA/NA/NA/NA	4
BP	GO:0071634	regulation of transforming growth factor beta production	3/77	40/18862	0.0005797	0.0147526	0.011461	TGFB2/LUM/THBS1	3				BP	GO:0071634	regulation of transforming growth factor beta production	3/77	40/18862	0.0005797	0.0147526	0.011461	NA/NA/NA	3
BP	GO:0001953	negative regulation of cell-matrix adhesion	3/77	41/18862	0.000623636	0.015587	0.0121092	SERPINE1/POSTN/THBS1	3				BP	GO:0001953	negative regulation of cell-matrix adhesion	3/77	41/18862	0.000623636	0.015587	0.0121092	NA/NA/NA	3
BP	GO:0010631	epithelial cell migration	7/77	357/18862	0.000633356	0.015587	0.0121092	TGFB2/ANXA1/THBS1/SRPX2/MET/MEOX2/MMP9	7				BP	GO:0010631	epithelial cell migration	7/77	357/18862	0.000633356	0.015587	0.0121092	NA/NA/NA/NA/NA/NA/NA	7
BP	GO:0010466	negative regulation of peptidase activity	6/77	257/18862	0.000637606	0.015587	0.0121092	SERPINE1/LTF/THBS1/SERPINA5/TIMP1/MMP9	6				BP	GO:0010466	negative regulation of peptidase activity	6/77	257/18862	0.000637606	0.015587	0.0121092	NA/NA/NA/NA/NA/NA	6
BP	GO:0007178	transmembrane receptor protein serine/threonine kinase signaling pathway	7/77	358/18862	0.000643897	0.015587	0.0121092	COL3A1/VASN/TGFB2/FMOD/GDF15/THBS1/COL1A2	7				BP	GO:0007178	transmembrane receptor protein serine/threonine kinase signaling pathway	7/77	358/18862	0.000643897	0.015587	0.0121092	NA/NA/NA/NA/NA/NA/NA	7
BP	GO:0042493	response to drug	7/77	359/18862	0.000654577	0.0156381	0.0121489	IGFBP2/TGFB2/ANXA1/NNMT/COL1A1/ABCC3/THBS1	7				BP	GO:0042493	response to drug	7/77	359/18862	0.000654577	0.0156381	0.0121489	NA/NA/NA/NA/NA/NA/NA	7
BP	GO:0090132	epithelium migration	7/77	360/18862	0.000665398	0.0156381	0.0121489	TGFB2/ANXA1/THBS1/SRPX2/MET/MEOX2/MMP9	7				BP	GO:0090132	epithelium migration	7/77	360/18862	0.000665398	0.0156381	0.0121489	NA/NA/NA/NA/NA/NA/NA	7
BP	GO:0071604	transforming growth factor beta production	3/77	42/18862	0.000669643	0.0156381	0.0121489	TGFB2/LUM/THBS1	3				BP	GO:0071604	transforming growth factor beta production	3/77	42/18862	0.000669643	0.0156381	0.0121489	NA/NA/NA	3
BP	GO:0001667	ameboidal-type cell migration	8/77	473/18862	0.000681887	0.0157389	0.0122272	TGFB2/ANXA1/THBS1/SRPX2/MET/TIMP1/MEOX2/MMP9	8				BP	GO:0001667	ameboidal-type cell migration	8/77	473/18862	0.000681887	0.0157389	0.0122272	NA/NA/NA/NA/NA/NA/NA/NA	8
BP	GO:0032309	icosanoid secretion	3/77	43/18862	0.000717761	0.016163	0.0125567	ANXA1/PLA2G2A/PLA2G5	3				BP	GO:0032309	icosanoid secretion	3/77	43/18862	0.000717761	0.016163	0.0125567	NA/NA/NA	3
BP	GO:0090130	tissue migration	7/77	365/18862	0.000721656	0.016163	0.0125567	TGFB2/ANXA1/THBS1/SRPX2/MET/MEOX2/MMP9	7				BP	GO:0090130	tissue migration	7/77	365/18862	0.000721656	0.016163	0.0125567	NA/NA/NA/NA/NA/NA/NA	7
BP	GO:0051918	negative regulation of fibrinolysis	2/77	10/18862	0.000724687	0.016163	0.0125567	SERPINE1/THBS1	2				BP	GO:0051918	negative regulation of fibrinolysis	2/77	10/18862	0.000724687	0.016163	0.0125567	NA/NA	2
BP	GO:0010717	regulation of epithelial to mesenchymal transition	4/77	100/18862	0.000748236	0.0165028	0.0128207	PDPN/VASN/TGFB2/COL1A1	4				BP	GO:0010717	regulation of epithelial to mesenchymal transition	4/77	100/18862	0.000748236	0.0165028	0.0128207	NA/NA/NA/NA	4
BP	GO:0035987	endodermal cell differentiation	3/77	44/18862	0.000768027	0.0167531	0.0130152	COL4A2/COL5A1/MMP9	3				BP	GO:0035987	endodermal cell differentiation	3/77	44/18862	0.000768027	0.0167531	0.0130152	NA/NA/NA	3
BP	GO:0043312	neutrophil degranulation	8/77	485/18862	0.000802458	0.0173139	0.0134508	PTX3/CHI3L1/PLAU/TTR/LTF/TNFAIP6/FABP5/MMP9	8				BP	GO:0043312	neutrophil degranulation	8/77	485/18862	0.000802458	0.0173139	0.0134508	NA/NA/NA/NA/NA/NA/NA/NA	8
BP	GO:0002283	neutrophil activation involved in immune response	8/77	488/18862	0.000835139	0.0178253	0.0138481	PTX3/CHI3L1/PLAU/TTR/LTF/TNFAIP6/FABP5/MMP9	8				BP	GO:0002283	neutrophil activation involved in immune response	8/77	488/18862	0.000835139	0.0178253	0.0138481	NA/NA/NA/NA/NA/NA/NA/NA	8
BP	GO:0043491	protein kinase B signaling	6/77	273/18862	0.000873249	0.0178931	0.0139008	CHI3L1/GDF15/THBS1/H19/MET/IGF2	6				BP	GO:0043491	protein kinase B signaling	6/77	273/18862	0.000873249	0.0178931	0.0139008	NA/NA/NA/NA/NA/NA	6
BP	GO:0008228	opsonization	2/77	11/18862	0.000883386	0.0178931	0.0139008	PTX3/PLA2G5	2				BP	GO:0008228	opsonization	2/77	11/18862	0.000883386	0.0178931	0.0139008	NA/NA	2
BP	GO:0033690	positive regulation of osteoblast proliferation	2/77	11/18862	0.000883386	0.0178931	0.0139008	CTHRC1/LTF	2				BP	GO:0033690	positive regulation of osteoblast proliferation	2/77	11/18862	0.000883386	0.0178931	0.0139008	NA/NA	2
BP	GO:0043589	skin morphogenesis	2/77	11/18862	0.000883386	0.0178931	0.0139008	COL1A1/COL1A2	2				BP	GO:0043589	skin morphogenesis	2/77	11/18862	0.000883386	0.0178931	0.0139008	NA/NA	2
BP	GO:0071492	cellular response to UV-A	2/77	11/18862	0.000883386	0.0178931	0.0139008	TIMP1/MMP9	2				BP	GO:0071492	cellular response to UV-A	2/77	11/18862	0.000883386	0.0178931	0.0139008	NA/NA	2
BP	GO:0051216	cartilage development	5/77	185/18862	0.000959879	0.0191408	0.0148701	HOXA5/LUM/CHI3L1/COL1A1/TIMP1	5				BP	GO:0051216	cartilage development	5/77	185/18862	0.000959879	0.0191408	0.0148701	NA/NA/NA/NA/NA	5
BP	GO:0002446	neutrophil mediated immunity	8/77	499/18862	0.00096427	0.0191408	0.0148701	PTX3/CHI3L1/PLAU/TTR/LTF/TNFAIP6/FABP5/MMP9	8				BP	GO:0002446	neutrophil mediated immunity	8/77	499/18862	0.00096427	0.0191408	0.0148701	NA/NA/NA/NA/NA/NA/NA/NA	8
BP	GO:0070482	response to oxygen levels	7/77	385/18862	0.000985563	0.019292	0.0149876	PDPN/VASN/TGFB2/POSTN/COL1A1/PLAU/THBS1	7				BP	GO:0070482	response to oxygen levels	7/77	385/18862	0.000985563	0.019292	0.0149876	NA/NA/NA/NA/NA/NA/NA	7
BP	GO:2001238	positive regulation of extrinsic apoptotic signaling pathway	3/77	48/18862	0.000991329	0.019292	0.0149876	G0S2/THBS1/TNFRSF12A	3				BP	GO:2001238	positive regulation of extrinsic apoptotic signaling pathway	3/77	48/18862	0.000991329	0.019292	0.0149876	NA/NA/NA	3
BP	GO:0032963	collagen metabolic process	4/77	109/18862	0.0010326	0.0199001	0.01546	COL1A1/COL1A2/COL5A1/MMP9	4				BP	GO:0032963	collagen metabolic process	4/77	109/18862	0.0010326	0.0199001	0.01546	NA/NA/NA/NA	4
BP	GO:0032908	regulation of transforming growth factor beta1 production	2/77	12/18862	0.00105726	0.0199873	0.0155277	LUM/THBS1	2				BP	GO:0032908	regulation of transforming growth factor beta1 production	2/77	12/18862	0.00105726	0.0199873	0.0155277	NA/NA	2
BP	GO:0042340	keratan sulfate catabolic process	2/77	12/18862	0.00105726	0.0199873	0.0155277	FMOD/LUM	2				BP	GO:0042340	keratan sulfate catabolic process	2/77	12/18862	0.00105726	0.0199873	0.0155277	NA/NA	2
BP	GO:0071674	mononuclear cell migration	5/77	190/18862	0.00108119	0.0202467	0.0157293	SERPINE1/ANXA1/THBS1/SAA1/CXCL10	5				BP	GO:0071674	mononuclear cell migration	5/77	190/18862	0.00108119	0.0202467	0.0157293	NA/NA/NA/NA/NA	5
BP	GO:0007566	embryo implantation	3/77	50/18862	0.00111683	0.0207091	0.0160884	LIF/TIMP1/MMP9	3				BP	GO:0007566	embryo implantation	3/77	50/18862	0.00111683	0.0207091	0.0160884	NA/NA/NA	3
BP	GO:0032102	negative regulation of response to external stimulus	7/77	394/18862	0.00112674	0.0207091	0.0160884	SERPINE1/PLAU/LTF/THBS1/SAA1/TNFAIP6/PLAT	7				BP	GO:0032102	negative regulation of response to external stimulus	7/77	394/18862	0.00112674	0.0207091	0.0160884	NA/NA/NA/NA/NA/NA/NA	7
BP	GO:0010718	positive regulation of epithelial to mesenchymal transition	3/77	51/18862	0.00118316	0.0215466	0.0167391	PDPN/TGFB2/COL1A1	3				BP	GO:0010718	positive regulation of epithelial to mesenchymal transition	3/77	51/18862	0.00118316	0.0215466	0.0167391	NA/NA/NA	3
BP	GO:0010755	regulation of plasminogen activation	2/77	13/18862	0.00124619	0.0217161	0.0168708	SERPINE1/THBS1	2				BP	GO:0010755	regulation of plasminogen activation	2/77	13/18862	0.00124619	0.0217161	0.0168708	NA/NA	2
BP	GO:0031392	regulation of prostaglandin biosynthetic process	2/77	13/18862	0.00124619	0.0217161	0.0168708	ANXA1/FABP5	2				BP	GO:0031392	regulation of prostaglandin biosynthetic process	2/77	13/18862	0.00124619	0.0217161	0.0168708	NA/NA	2
BP	GO:0032905	transforming growth factor beta1 production	2/77	13/18862	0.00124619	0.0217161	0.0168708	LUM/THBS1	2				BP	GO:0032905	transforming growth factor beta1 production	2/77	13/18862	0.00124619	0.0217161	0.0168708	NA/NA	2
BP	GO:0046348	amino sugar catabolic process	2/77	13/18862	0.00124619	0.0217161	0.0168708	CHI3L1/CHI3L2	2				BP	GO:0046348	amino sugar catabolic process	2/77	13/18862	0.00124619	0.0217161	0.0168708	NA/NA	2
BP	GO:0002696	positive regulation of leukocyte activation	7/77	401/18862	0.00124717	0.0217161	0.0168708	IGFBP2/ANXA1/IGHM/IGHA1/IGHG4/THBS1/IGF2	7				BP	GO:0002696	positive regulation of leukocyte activation	7/77	401/18862	0.00124717	0.0217161	0.0168708	NA/NA/NA/NA/NA/NA/NA	7
BP	GO:0001706	endoderm formation	3/77	53/18862	0.00132318	0.0224562	0.0174457	COL4A2/COL5A1/MMP9	3				BP	GO:0001706	endoderm formation	3/77	53/18862	0.00132318	0.0224562	0.0174457	NA/NA/NA	3
BP	GO:0009620	response to fungus	3/77	53/18862	0.00132318	0.0224562	0.0174457	PTX3/PLA2G5/LTF	3				BP	GO:0009620	response to fungus	3/77	53/18862	0.00132318	0.0224562	0.0174457	NA/NA/NA	3
BP	GO:0071356	cellular response to tumor necrosis factor	6/77	296/18862	0.00132361	0.0224562	0.0174457	NPNT/POSTN/CHI3L1/COL1A1/THBS1/TNFRSF12A	6				BP	GO:0071356	cellular response to tumor necrosis factor	6/77	296/18862	0.00132361	0.0224562	0.0174457	NA/NA/NA/NA/NA/NA	6
BP	GO:0051917	regulation of fibrinolysis	2/77	14/18862	0.00145004	0.024095	0.0187189	SERPINE1/THBS1	2				BP	GO:0051917	regulation of fibrinolysis	2/77	14/18862	0.00145004	0.024095	0.0187189	NA/NA	2
BP	GO:0070141	response to UV-A	2/77	14/18862	0.00145004	0.024095	0.0187189	TIMP1/MMP9	2				BP	GO:0070141	response to UV-A	2/77	14/18862	0.00145004	0.024095	0.0187189	NA/NA	2
BP	GO:0050867	positive regulation of cell activation	7/77	412/18862	0.00145662	0.024095	0.0187189	IGFBP2/ANXA1/IGHM/IGHA1/IGHG4/THBS1/IGF2	7				BP	GO:0050867	positive regulation of cell activation	7/77	412/18862	0.00145662	0.024095	0.0187189	NA/NA/NA/NA/NA/NA/NA	7
BP	GO:0048732	gland development	7/77	413/18862	0.00147695	0.0242293	0.0188233	HOXA5/TGFB2/ANXA1/SERPINA5/MET/HOXD9/IGF2	7				BP	GO:0048732	gland development	7/77	413/18862	0.00147695	0.0242293	0.0188233	NA/NA/NA/NA/NA/NA/NA	7
BP	GO:0043588	skin development	7/77	415/18862	0.00151827	0.024703	0.0191912	COL3A1/TGFB2/ANXA1/COL1A1/MET/COL1A2/COL5A1	7				BP	GO:0043588	skin development	7/77	415/18862	0.00151827	0.024703	0.0191912	NA/NA/NA/NA/NA/NA/NA	7
BP	GO:0046456	icosanoid biosynthetic process	3/77	56/18862	0.00155204	0.0250472	0.0194587	ANXA1/PLA2G5/FABP5	3				BP	GO:0046456	icosanoid biosynthetic process	3/77	56/18862	0.00155204	0.0250472	0.0194587	NA/NA/NA	3
BP	GO:0042476	odontogenesis	4/77	123/18862	0.00161421	0.0258403	0.0200748	SERPINE1/TGFB2/COL1A1/COL1A2	4				BP	GO:0042476	odontogenesis	4/77	123/18862	0.00161421	0.0258403	0.0200748	NA/NA/NA/NA	4
BP	GO:0044793	negative regulation by host of viral process	2/77	15/18862	0.00166871	0.0262888	0.0204232	PTX3/LTF	2				BP	GO:0044793	negative regulation by host of viral process	2/77	15/18862	0.00166871	0.0262888	0.0204232	NA/NA	2
BP	GO:2001279	regulation of unsaturated fatty acid biosynthetic process	2/77	15/18862	0.00166871	0.0262888	0.0204232	ANXA1/FABP5	2				BP	GO:2001279	regulation of unsaturated fatty acid biosynthetic process	2/77	15/18862	0.00166871	0.0262888	0.0204232	NA/NA	2
BP	GO:0001952	regulation of cell-matrix adhesion	4/77	125/18862	0.00171261	0.0265589	0.0206331	SERPINE1/POSTN/PLAU/THBS1	4				BP	GO:0001952	regulation of cell-matrix adhesion	4/77	125/18862	0.00171261	0.0265589	0.0206331	NA/NA/NA/NA	4
BP	GO:0032355	response to estradiol	4/77	125/18862	0.00171261	0.0265589	0.0206331	IGFBP2/ANXA1/POSTN/COL1A1	4				BP	GO:0032355	response to estradiol	4/77	125/18862	0.00171261	0.0265589	0.0206331	NA/NA/NA/NA	4
BP	GO:0006911	phagocytosis, engulfment	4/77	126/18862	0.00176335	0.0271337	0.0210796	IGHM/IGHA1/IGHG4/THBS1	4				BP	GO:0006911	phagocytosis, engulfment	4/77	126/18862	0.00176335	0.0271337	0.0210796	NA/NA/NA/NA	4
BP	GO:0090303	positive regulation of wound healing	3/77	59/18862	0.0018043	0.0275502	0.0214032	SERPINE1/ANXA1/THBS1	3				BP	GO:0090303	positive regulation of wound healing	3/77	59/18862	0.0018043	0.0275502	0.0214032	NA/NA/NA	3
BP	GO:0060263	regulation of respiratory burst	2/77	16/18862	0.00190206	0.0288212	0.0223906	IGHA1/JCHAIN	2				BP	GO:0060263	regulation of respiratory burst	2/77	16/18862	0.00190206	0.0288212	0.0223906	NA/NA	2
BP	GO:0097191	extrinsic apoptotic signaling pathway	5/77	217/18862	0.00194243	0.0290967	0.0226047	SERPINE1/TGFB2/G0S2/THBS1/TNFRSF12A	5				BP	GO:0097191	extrinsic apoptotic signaling pathway	5/77	217/18862	0.00194243	0.0290967	0.0226047	NA/NA/NA/NA/NA	5
BP	GO:0001655	urogenital system development	6/77	320/18862	0.00196421	0.0290967	0.0226047	COL4A1/TGFB2/ANXA1/NPNT/LIF/MMP9	6				BP	GO:0001655	urogenital system development	6/77	320/18862	0.00196421	0.0290967	0.0226047	NA/NA/NA/NA/NA/NA	6
BP	GO:0034612	response to tumor necrosis factor	6/77	320/18862	0.00196421	0.0290967	0.0226047	NPNT/POSTN/CHI3L1/COL1A1/THBS1/TNFRSF12A	6				BP	GO:0034612	response to tumor necrosis factor	6/77	320/18862	0.00196421	0.0290967	0.0226047	NA/NA/NA/NA/NA/NA	6
BP	GO:0071230	cellular response to amino acid stimulus	3/77	61/18862	0.00198586	0.0291995	0.0226845	COL4A1/COL1A1/COL1A2	3				BP	GO:0071230	cellular response to amino acid stimulus	3/77	61/18862	0.00198586	0.0291995	0.0226845	NA/NA/NA	3
BP	GO:0001819	positive regulation of cytokine production	7/77	437/18862	0.00203511	0.0297036	0.0230761	SERPINE1/ANXA1/POSTN/LUM/THBS1/SAA1/H19	7				BP	GO:0001819	positive regulation of cytokine production	7/77	437/18862	0.00203511	0.0297036	0.0230761	NA/NA/NA/NA/NA/NA/NA	7
BP	GO:0010595	positive regulation of endothelial cell migration	4/77	132/18862	0.00208987	0.0302803	0.0235241	ANXA1/THBS1/SRPX2/MET	4				BP	GO:0010595	positive regulation of endothelial cell migration	4/77	132/18862	0.00208987	0.0302803	0.0235241	NA/NA/NA/NA	4
BP	GO:0034374	low-density lipoprotein particle remodeling	2/77	17/18862	0.00214997	0.0309253	0.0240252	PLA2G2A/PLA2G5	2				BP	GO:0034374	low-density lipoprotein particle remodeling	2/77	17/18862	0.00214997	0.0309253	0.0240252	NA/NA	2
BP	GO:0016064	immunoglobulin mediated immune response	5/77	223/18862	0.00218731	0.031236	0.0242666	IGLV3-21/IGHM/IGHA1/IGHG4/IL13RA2	5				BP	GO:0016064	immunoglobulin mediated immune response	5/77	223/18862	0.00218731	0.031236	0.0242666	NA/NA/NA/NA/NA	5
BP	GO:0007266	Rho protein signal transduction	4/77	134/18862	0.0022074	0.0312978	0.0243146	COL3A1/PDPN/MET/COL1A2	4				BP	GO:0007266	Rho protein signal transduction	4/77	134/18862	0.0022074	0.0312978	0.0243146	NA/NA/NA/NA	4
BP	GO:0000302	response to reactive oxygen species	5/77	224/18862	0.00223021	0.031397	0.0243916	ANXA1/COL1A1/H19/MET/MMP9	5				BP	GO:0000302	response to reactive oxygen species	5/77	224/18862	0.00223021	0.031397	0.0243916	NA/NA/NA/NA/NA	5
BP	GO:0051783	regulation of nuclear division	4/77	135/18862	0.00226784	0.0314802	0.0244563	CCDC8/LIF/BUB1B/IGF2	4				BP	GO:0051783	regulation of nuclear division	4/77	135/18862	0.00226784	0.0314802	0.0244563	NA/NA/NA/NA	4
BP	GO:0099024	plasma membrane invagination	4/77	135/18862	0.00226784	0.0314802	0.0244563	IGHM/IGHA1/IGHG4/THBS1	4				BP	GO:0099024	plasma membrane invagination	4/77	135/18862	0.00226784	0.0314802	0.0244563	NA/NA/NA/NA	4
BP	GO:0019724	B cell mediated immunity	5/77	226/18862	0.00231786	0.0319511	0.0248221	IGLV3-21/IGHM/IGHA1/IGHG4/IL13RA2	5				BP	GO:0019724	B cell mediated immunity	5/77	226/18862	0.00231786	0.0319511	0.0248221	NA/NA/NA/NA/NA	5
BP	GO:0036148	phosphatidylglycerol acyl-chain remodeling	2/77	18/18862	0.00241234	0.0323546	0.0251356	PLA2G2A/PLA2G5	2				BP	GO:0036148	phosphatidylglycerol acyl-chain remodeling	2/77	18/18862	0.00241234	0.0323546	0.0251356	NA/NA	2
BP	GO:0036149	phosphatidylinositol acyl-chain remodeling	2/77	18/18862	0.00241234	0.0323546	0.0251356	PLA2G2A/PLA2G5	2				BP	GO:0036149	phosphatidylinositol acyl-chain remodeling	2/77	18/18862	0.00241234	0.0323546	0.0251356	NA/NA	2
BP	GO:1901739	regulation of myoblast fusion	2/77	18/18862	0.00241234	0.0323546	0.0251356	GDF15/CXCL10	2				BP	GO:1901739	regulation of myoblast fusion	2/77	18/18862	0.00241234	0.0323546	0.0251356	NA/NA	2
BP	GO:2000696	regulation of epithelial cell differentiation involved in kidney development	2/77	18/18862	0.00241234	0.0323546	0.0251356	LIF/MMP9	2				BP	GO:2000696	regulation of epithelial cell differentiation involved in kidney development	2/77	18/18862	0.00241234	0.0323546	0.0251356	NA/NA	2
BP	GO:0050921	positive regulation of chemotaxis	4/77	139/18862	0.00252105	0.0335858	0.0260921	SERPINE1/THBS1/MET/CXCL10	4				BP	GO:0050921	positive regulation of chemotaxis	4/77	139/18862	0.00252105	0.0335858	0.0260921	NA/NA/NA/NA	4
BP	GO:0010594	regulation of endothelial cell migration	5/77	231/18862	0.00254795	0.0337178	0.0261947	ANXA1/THBS1/SRPX2/MET/MEOX2	5				BP	GO:0010594	regulation of endothelial cell migration	5/77	231/18862	0.00254795	0.0337178	0.0261947	NA/NA/NA/NA/NA	5
BP	GO:0008037	cell recognition	5/77	232/18862	0.00259589	0.0339203	0.026352	IGHM/PTX3/IGHA1/PLA2G5/IGHG4	5				BP	GO:0008037	cell recognition	5/77	232/18862	0.00259589	0.0339203	0.026352	NA/NA/NA/NA/NA	5
BP	GO:0045669	positive regulation of osteoblast differentiation	3/77	67/18862	0.00259742	0.0339203	0.026352	CTHRC1/NPNT/LTF	3				BP	GO:0045669	positive regulation of osteoblast differentiation	3/77	67/18862	0.00259742	0.0339203	0.026352	NA/NA/NA	3
BP	GO:0006958	complement activation, classical pathway	4/77	141/18862	0.00265466	0.0344411	0.0267566	IGLV3-21/IGHM/IGHA1/IGHG4	4				BP	GO:0006958	complement activation, classical pathway	4/77	141/18862	0.00265466	0.0344411	0.0267566	NA/NA/NA/NA	4
BP	GO:0010744	positive regulation of macrophage derived foam cell differentiation	2/77	19/18862	0.00268903	0.0346605	0.026927	PLA2G2A/PLA2G5	2				BP	GO:0010744	positive regulation of macrophage derived foam cell differentiation	2/77	19/18862	0.00268903	0.0346605	0.026927	NA/NA	2
BP	GO:0002548	monocyte chemotaxis	3/77	68/18862	0.00270939	0.0346976	0.0269559	SERPINE1/ANXA1/CXCL10	3				BP	GO:0002548	monocyte chemotaxis	3/77	68/18862	0.00270939	0.0346976	0.0269559	NA/NA/NA	3
BP	GO:0006869	lipid transport	7/77	461/18862	0.00274484	0.0349264	0.0271336	ANXA1/PLA2G2A/PLA2G5/ABCC3/THBS1/SERPINA5/FABP5	7				BP	GO:0006869	lipid transport	7/77	461/18862	0.00274484	0.0349264	0.0271336	NA/NA/NA/NA/NA/NA/NA	7
BP	GO:0010324	membrane invagination	4/77	143/18862	0.00279305	0.03509	0.0272607	IGHM/IGHA1/IGHG4/THBS1	4				BP	GO:0010324	membrane invagination	4/77	143/18862	0.00279305	0.03509	0.0272607	NA/NA/NA/NA	4
BP	GO:0048754	branching morphogenesis of an epithelial tube	4/77	143/18862	0.00279305	0.03509	0.0272607	HOXA5/COL4A1/NPNT/MET	4				BP	GO:0048754	branching morphogenesis of an epithelial tube	4/77	143/18862	0.00279305	0.03509	0.0272607	NA/NA/NA/NA	4
BP	GO:0071229	cellular response to acid chemical	3/77	69/18862	0.00282429	0.0352592	0.0273922	COL4A1/COL1A1/COL1A2	3				BP	GO:0071229	cellular response to acid chemical	3/77	69/18862	0.00282429	0.0352592	0.0273922	NA/NA/NA	3
BP	GO:0009713	catechol-containing compound biosynthetic process	2/77	20/18862	0.00297992	0.0365133	0.0283664	TGFB2/MOXD1	2				BP	GO:0009713	catechol-containing compound biosynthetic process	2/77	20/18862	0.00297992	0.0365133	0.0283664	NA/NA	2
BP	GO:0042423	catecholamine biosynthetic process	2/77	20/18862	0.00297992	0.0365133	0.0283664	TGFB2/MOXD1	2				BP	GO:0042423	catecholamine biosynthetic process	2/77	20/18862	0.00297992	0.0365133	0.0283664	NA/NA	2
BP	GO:0090026	positive regulation of monocyte chemotaxis	2/77	20/18862	0.00297992	0.0365133	0.0283664	SERPINE1/CXCL10	2				BP	GO:0090026	positive regulation of monocyte chemotaxis	2/77	20/18862	0.00297992	0.0365133	0.0283664	NA/NA	2
BP	GO:0007519	skeletal muscle tissue development	4/77	147/18862	0.00308455	0.0375633	0.0291822	DMRTA2/MEOX2/HOXD9/IGF2	4				BP	GO:0007519	skeletal muscle tissue development	4/77	147/18862	0.00308455	0.0375633	0.0291822	NA/NA/NA/NA	4
BP	GO:1903036	positive regulation of response to wounding	3/77	72/18862	0.00318689	0.038573	0.0299666	SERPINE1/ANXA1/THBS1	3				BP	GO:1903036	positive regulation of response to wounding	3/77	72/18862	0.00318689	0.038573	0.0299666	NA/NA/NA	3
BP	GO:0033630	positive regulation of cell adhesion mediated by integrin	2/77	21/18862	0.00328492	0.0389363	0.0302488	TGFB2/LIF	2				BP	GO:0033630	positive regulation of cell adhesion mediated by integrin	2/77	21/18862	0.00328492	0.0389363	0.0302488	NA/NA	2
BP	GO:0071636	positive regulation of transforming growth factor beta production	2/77	21/18862	0.00328492	0.0389363	0.0302488	LUM/THBS1	2				BP	GO:0071636	positive regulation of transforming growth factor beta production	2/77	21/18862	0.00328492	0.0389363	0.0302488	NA/NA	2
BP	GO:0031016	pancreas development	3/77	73/18862	0.0033138	0.0389363	0.0302488	ANXA1/MET/IGF2	3				BP	GO:0031016	pancreas development	3/77	73/18862	0.0033138	0.0389363	0.0302488	NA/NA/NA	3
BP	GO:0042246	tissue regeneration	3/77	73/18862	0.0033138	0.0389363	0.0302488	ANXA1/POSTN/LGR6	3				BP	GO:0042246	tissue regeneration	3/77	73/18862	0.0033138	0.0389363	0.0302488	NA/NA/NA	3
BP	GO:0043535	regulation of blood vessel endothelial cell migration	4/77	150/18862	0.00331635	0.0389363	0.0302488	ANXA1/THBS1/SRPX2/MEOX2	4				BP	GO:0043535	regulation of blood vessel endothelial cell migration	4/77	150/18862	0.00331635	0.0389363	0.0302488	NA/NA/NA/NA	4
BP	GO:0051251	positive regulation of lymphocyte activation	6/77	356/18862	0.00333459	0.0389363	0.0302488	IGFBP2/ANXA1/IGHM/IGHA1/IGHG4/IGF2	6				BP	GO:0051251	positive regulation of lymphocyte activation	6/77	356/18862	0.00333459	0.0389363	0.0302488	NA/NA/NA/NA/NA/NA	6
BP	GO:0001837	epithelial to mesenchymal transition	4/77	153/18862	0.00355977	0.0408783	0.0317575	PDPN/VASN/TGFB2/COL1A1	4				BP	GO:0001837	epithelial to mesenchymal transition	4/77	153/18862	0.00355977	0.0408783	0.0317575	NA/NA/NA/NA	4
BP	GO:0043536	positive regulation of blood vessel endothelial cell migration	3/77	75/18862	0.00357682	0.0408783	0.0317575	ANXA1/THBS1/SRPX2	3				BP	GO:0043536	positive regulation of blood vessel endothelial cell migration	3/77	75/18862	0.00357682	0.0408783	0.0317575	NA/NA/NA	3
BP	GO:0036150	phosphatidylserine acyl-chain remodeling	2/77	22/18862	0.00360388	0.0408783	0.0317575	PLA2G2A/PLA2G5	2				BP	GO:0036150	phosphatidylserine acyl-chain remodeling	2/77	22/18862	0.00360388	0.0408783	0.0317575	NA/NA	2
BP	GO:0055093	response to hyperoxia	2/77	22/18862	0.00360388	0.0408783	0.0317575	PDPN/COL1A1	2				BP	GO:0055093	response to hyperoxia	2/77	22/18862	0.00360388	0.0408783	0.0317575	NA/NA	2
BP	GO:1901032	negative regulation of response to reactive oxygen species	2/77	22/18862	0.00360388	0.0408783	0.0317575	H19/MET	2				BP	GO:1901032	negative regulation of response to reactive oxygen species	2/77	22/18862	0.00360388	0.0408783	0.0317575	NA/NA	2
BP	GO:2001236	regulation of extrinsic apoptotic signaling pathway	4/77	154/18862	0.00364354	0.0410933	0.0319245	SERPINE1/G0S2/THBS1/TNFRSF12A	4				BP	GO:2001236	regulation of extrinsic apoptotic signaling pathway	4/77	154/18862	0.00364354	0.0410933	0.0319245	NA/NA/NA/NA	4
BP	GO:0007492	endoderm development	3/77	76/18862	0.00371298	0.0416399	0.0323492	COL4A2/COL5A1/MMP9	3				BP	GO:0007492	endoderm development	3/77	76/18862	0.00371298	0.0416399	0.0323492	NA/NA/NA	3
BP	GO:0002455	humoral immune response mediated by circulating immunoglobulin	4/77	156/18862	0.00381507	0.0423408	0.0328937	IGLV3-21/IGHM/IGHA1/IGHG4	4				BP	GO:0002455	humoral immune response mediated by circulating immunoglobulin	4/77	156/18862	0.00381507	0.0423408	0.0328937	NA/NA/NA/NA	4
BP	GO:0050727	regulation of inflammatory response	6/77	366/18862	0.00381814	0.0423408	0.0328937	SERPINE1/ANXA1/PLA2G2A/SAA1/TNFAIP6/MMP9	6				BP	GO:0050727	regulation of inflammatory response	6/77	366/18862	0.00381814	0.0423408	0.0328937	NA/NA/NA/NA/NA/NA	6
BP	GO:0002460	adaptive immune response based on somatic recombination of immune receptors built from immunoglobulin superfamily domains	6/77	367/18862	0.00386921	0.0426688	0.0331485	IGLV3-21/ANXA1/IGHM/IGHA1/IGHG4/IL13RA2	6				BP	GO:0002460	adaptive immune response based on somatic recombination of immune receptors built from immunoglobulin superfamily domains	6/77	367/18862	0.00386921	0.0426688	0.0331485	NA/NA/NA/NA/NA/NA	6
BP	GO:0060538	skeletal muscle organ development	4/77	157/18862	0.00390286	0.0427014	0.0331738	DMRTA2/MEOX2/HOXD9/IGF2	4				BP	GO:0060538	skeletal muscle organ development	4/77	157/18862	0.00390286	0.0427014	0.0331738	NA/NA/NA/NA	4
BP	GO:0030194	positive regulation of blood coagulation	2/77	23/18862	0.00393671	0.0427014	0.0331738	SERPINE1/THBS1	2				BP	GO:0030194	positive regulation of blood coagulation	2/77	23/18862	0.00393671	0.0427014	0.0331738	NA/NA	2
BP	GO:1900048	positive regulation of hemostasis	2/77	23/18862	0.00393671	0.0427014	0.0331738	SERPINE1/THBS1	2				BP	GO:1900048	positive regulation of hemostasis	2/77	23/18862	0.00393671	0.0427014	0.0331738	NA/NA	2
BP	GO:0034614	cellular response to reactive oxygen species	4/77	159/18862	0.00408254	0.0440426	0.0342158	ANXA1/H19/MET/MMP9	4				BP	GO:0034614	cellular response to reactive oxygen species	4/77	159/18862	0.00408254	0.0440426	0.0342158	NA/NA/NA/NA	4
BP	GO:0031214	biomineral tissue development	4/77	160/18862	0.00417444	0.0447906	0.0347969	COL1A1/LTF/COL1A2/IBSP	4				BP	GO:0031214	biomineral tissue development	4/77	160/18862	0.00417444	0.0447906	0.0347969	NA/NA/NA/NA	4
BP	GO:0003094	glomerular filtration	2/77	24/18862	0.00428327	0.0448101	0.0348121	IGHA1/JCHAIN	2				BP	GO:0003094	glomerular filtration	2/77	24/18862	0.00428327	0.0448101	0.0348121	NA/NA	2
BP	GO:0050820	positive regulation of coagulation	2/77	24/18862	0.00428327	0.0448101	0.0348121	SERPINE1/THBS1	2				BP	GO:0050820	positive regulation of coagulation	2/77	24/18862	0.00428327	0.0448101	0.0348121	NA/NA	2
BP	GO:2001026	regulation of endothelial cell chemotaxis	2/77	24/18862	0.00428327	0.0448101	0.0348121	THBS1/MET	2				BP	GO:2001026	regulation of endothelial cell chemotaxis	2/77	24/18862	0.00428327	0.0448101	0.0348121	NA/NA	2
BP	GO:0001895	retina homeostasis	3/77	80/18862	0.00428913	0.0448101	0.0348121	IGHA1/LTF/JCHAIN	3				BP	GO:0001895	retina homeostasis	3/77	80/18862	0.00428913	0.0448101	0.0348121	NA/NA/NA	3
BP	GO:2000117	negative regulation of cysteine-type endopeptidase activity	3/77	80/18862	0.00428913	0.0448101	0.0348121	LTF/THBS1/MMP9	3				BP	GO:2000117	negative regulation of cysteine-type endopeptidase activity	3/77	80/18862	0.00428913	0.0448101	0.0348121	NA/NA/NA	3
BP	GO:0110148	biomineralization	4/77	162/18862	0.00436243	0.0453373	0.0352216	COL1A1/LTF/COL1A2/IBSP	4				BP	GO:0110148	biomineralization	4/77	162/18862	0.00436243	0.0453373	0.0352216	NA/NA/NA/NA	4
BP	GO:0014910	regulation of smooth muscle cell migration	3/77	81/18862	0.00444115	0.0456195	0.0354408	SERPINE1/POSTN/PLAU	3				BP	GO:0014910	regulation of smooth muscle cell migration	3/77	81/18862	0.00444115	0.0456195	0.0354408	NA/NA/NA	3
BP	GO:0022617	extracellular matrix disassembly	3/77	81/18862	0.00444115	0.0456195	0.0354408	PDPN/TIMP1/MMP9	3				BP	GO:0022617	extracellular matrix disassembly	3/77	81/18862	0.00444115	0.0456195	0.0354408	NA/NA/NA	3
BP	GO:0030324	lung development	4/77	163/18862	0.00445853	0.0456195	0.0354408	HOXA5/PDPN/CHI3L1/LIF	4				BP	GO:0030324	lung development	4/77	163/18862	0.00445853	0.0456195	0.0354408	NA/NA/NA/NA	4
BP	GO:0097205	renal filtration	2/77	25/18862	0.00464347	0.0471438	0.036625	IGHA1/JCHAIN	2				BP	GO:0097205	renal filtration	2/77	25/18862	0.00464347	0.0471438	0.036625	NA/NA	2
BP	GO:0007584	response to nutrient	4/77	165/18862	0.00465501	0.0471438	0.036625	IGFBP2/POSTN/COL1A1/CXCL10	4				BP	GO:0007584	response to nutrient	4/77	165/18862	0.00465501	0.0471438	0.036625	NA/NA/NA/NA	4
BP	GO:0030323	respiratory tube development	4/77	167/18862	0.00485724	0.0489422	0.0380222	HOXA5/PDPN/CHI3L1/LIF	4				BP	GO:0030323	respiratory tube development	4/77	167/18862	0.00485724	0.0489422	0.0380222	NA/NA/NA/NA	4
BP	GO:0036152	phosphatidylethanolamine acyl-chain remodeling	2/77	26/18862	0.00501718	0.0495478	0.0384926	PLA2G2A/PLA2G5	2				BP	GO:0036152	phosphatidylethanolamine acyl-chain remodeling	2/77	26/18862	0.00501718	0.0495478	0.0384926	NA/NA	2
BP	GO:0042104	positive regulation of activated T cell proliferation	2/77	26/18862	0.00501718	0.0495478	0.0384926	IGFBP2/IGF2	2				BP	GO:0042104	positive regulation of activated T cell proliferation	2/77	26/18862	0.00501718	0.0495478	0.0384926	NA/NA	2
BP	GO:0060142	regulation of syncytium formation by plasma membrane fusion	2/77	26/18862	0.00501718	0.0495478	0.0384926	GDF15/CXCL10	2				BP	GO:0060142	regulation of syncytium formation by plasma membrane fusion	2/77	26/18862	0.00501718	0.0495478	0.0384926	NA/NA	2
BP	GO:1901071	glucosamine-containing compound metabolic process	2/77	26/18862	0.00501718	0.0495478	0.0384926	CHI3L1/CHI3L2	2				BP	GO:1901071	glucosamine-containing compound metabolic process	2/77	26/18862	0.00501718	0.0495478	0.0384926	NA/NA	2
BP	GO:0050829	defense response to Gram-negative bacterium	3/77	85/18862	0.00508178	0.0499373	0.0387952	SERPINE1/IGHM/LTF	3				BP	GO:0050829	defense response to Gram-negative bacterium	3/77	85/18862	0.00508178	0.0499373	0.0387952	NA/NA/NA	3
BP	GO:0006022	aminoglycan metabolic process	4/77	172/18862	0.00538849	0.0515746	0.0400672	FMOD/LUM/CHI3L1/CHI3L2	4				BP	GO:0006022	aminoglycan metabolic process	4/77	172/18862	0.00538849	0.0515746	0.0400672	NA/NA/NA/NA	4
BP	GO:0010955	negative regulation of protein processing	2/77	27/18862	0.00540429	0.0515746	0.0400672	SERPINE1/THBS1	2				BP	GO:0010955	negative regulation of protein processing	2/77	27/18862	0.00540429	0.0515746	0.0400672	NA/NA	2
BP	GO:0033688	regulation of osteoblast proliferation	2/77	27/18862	0.00540429	0.0515746	0.0400672	CTHRC1/LTF	2				BP	GO:0033688	regulation of osteoblast proliferation	2/77	27/18862	0.00540429	0.0515746	0.0400672	NA/NA	2
BP	GO:0090025	regulation of monocyte chemotaxis	2/77	27/18862	0.00540429	0.0515746	0.0400672	SERPINE1/CXCL10	2				BP	GO:0090025	regulation of monocyte chemotaxis	2/77	27/18862	0.00540429	0.0515746	0.0400672	NA/NA	2
BP	GO:1902883	negative regulation of response to oxidative stress	2/77	27/18862	0.00540429	0.0515746	0.0400672	H19/MET	2				BP	GO:1902883	negative regulation of response to oxidative stress	2/77	27/18862	0.00540429	0.0515746	0.0400672	NA/NA	2
BP	GO:1903318	negative regulation of protein maturation	2/77	27/18862	0.00540429	0.0515746	0.0400672	SERPINE1/THBS1	2				BP	GO:1903318	negative regulation of protein maturation	2/77	27/18862	0.00540429	0.0515746	0.0400672	NA/NA	2
BP	GO:0061138	morphogenesis of a branching epithelium	4/77	173/18862	0.00549922	0.0522295	0.040576	HOXA5/COL4A1/NPNT/MET	4				BP	GO:0061138	morphogenesis of a branching epithelium	4/77	173/18862	0.00549922	0.0522295	0.040576	NA/NA/NA/NA	4
BP	GO:0043542	endothelial cell migration	5/77	278/18862	0.00559019	0.0528406	0.0410507	ANXA1/THBS1/SRPX2/MET/MEOX2	5				BP	GO:0043542	endothelial cell migration	5/77	278/18862	0.00559019	0.0528406	0.0410507	NA/NA/NA/NA/NA	5
BP	GO:0043534	blood vessel endothelial cell migration	4/77	175/18862	0.00572523	0.0538606	0.0418432	ANXA1/THBS1/SRPX2/MEOX2	4				BP	GO:0043534	blood vessel endothelial cell migration	4/77	175/18862	0.00572523	0.0538606	0.0418432	NA/NA/NA/NA	4
BP	GO:0033273	response to vitamin	3/77	89/18862	0.00577538	0.0540761	0.0420106	POSTN/COL1A1/CXCL10	3				BP	GO:0033273	response to vitamin	3/77	89/18862	0.00577538	0.0540761	0.0420106	NA/NA/NA	3
BP	GO:0018146	keratan sulfate biosynthetic process	2/77	28/18862	0.00580469	0.0540953	0.0420255	FMOD/LUM	2				BP	GO:0018146	keratan sulfate biosynthetic process	2/77	28/18862	0.00580469	0.0540953	0.0420255	NA/NA	2
BP	GO:0046470	phosphatidylcholine metabolic process	3/77	90/18862	0.00595719	0.0547471	0.0425319	PLA2G2A/PLA2G5/FABP5	3				BP	GO:0046470	phosphatidylcholine metabolic process	3/77	90/18862	0.00595719	0.0547471	0.0425319	NA/NA/NA	3
BP	GO:0061326	renal tubule development	3/77	90/18862	0.00595719	0.0547471	0.0425319	COL4A1/NPNT/LIF	3				BP	GO:0061326	renal tubule development	3/77	90/18862	0.00595719	0.0547471	0.0425319	NA/NA/NA	3
BP	GO:0007565	female pregnancy	4/77	177/18862	0.00595737	0.0547471	0.0425319	IGFBP2/LIF/TIMP1/MMP9	4				BP	GO:0007565	female pregnancy	4/77	177/18862	0.00595737	0.0547471	0.0425319	NA/NA/NA/NA	4
BP	GO:0002683	negative regulation of immune system process	6/77	403/18862	0.0060692	0.0550702	0.0427829	COL3A1/TGFB2/ANXA1/LTF/THBS1/IL13RA2	6				BP	GO:0002683	negative regulation of immune system process	6/77	403/18862	0.0060692	0.0550702	0.0427829	NA/NA/NA/NA/NA/NA	6
BP	GO:0006956	complement activation	4/77	178/18862	0.00607576	0.0550702	0.0427829	IGLV3-21/IGHM/IGHA1/IGHG4	4				BP	GO:0006956	complement activation	4/77	178/18862	0.00607576	0.0550702	0.0427829	NA/NA/NA/NA	4
BP	GO:0015718	monocarboxylic acid transport	4/77	178/18862	0.00607576	0.0550702	0.0427829	ANXA1/PLA2G2A/PLA2G5/ABCC3	4				BP	GO:0015718	monocarboxylic acid transport	4/77	178/18862	0.00607576	0.0550702	0.0427829	NA/NA/NA/NA	4
BP	GO:0002690	positive regulation of leukocyte chemotaxis	3/77	91/18862	0.0061424	0.0554212	0.0430556	SERPINE1/THBS1/CXCL10	3				BP	GO:0002690	positive regulation of leukocyte chemotaxis	3/77	91/18862	0.0061424	0.0554212	0.0430556	NA/NA/NA	3
BP	GO:0048608	reproductive structure development	6/77	405/18862	0.00621357	0.0556002	0.0431947	TGFB2/ANXA1/PTX3/SERPINA5/LIF/IGF2	6				BP	GO:0048608	reproductive structure development	6/77	405/18862	0.00621357	0.0556002	0.0431947	NA/NA/NA/NA/NA/NA	6
BP	GO:0036296	response to increased oxygen levels	2/77	29/18862	0.00621826	0.0556002	0.0431947	PDPN/COL1A1	2				BP	GO:0036296	response to increased oxygen levels	2/77	29/18862	0.00621826	0.0556002	0.0431947	NA/NA	2
BP	GO:0060485	mesenchyme development	5/77	287/18862	0.00638039	0.0567941	0.0441221	HOXA5/PDPN/VASN/TGFB2/COL1A1	5				BP	GO:0060485	mesenchyme development	5/77	287/18862	0.00638039	0.0567941	0.0441221	NA/NA/NA/NA/NA	5
BP	GO:0061458	reproductive system development	6/77	408/18862	0.0064348	0.0570226	0.0442997	TGFB2/ANXA1/PTX3/SERPINA5/LIF/IGF2	6				BP	GO:0061458	reproductive system development	6/77	408/18862	0.0064348	0.0570226	0.0442997	NA/NA/NA/NA/NA/NA	6
BP	GO:0072001	renal system development	5/77	288/18862	0.00647279	0.0571044	0.0443632	COL4A1/TGFB2/NPNT/LIF/MMP9	5				BP	GO:0072001	renal system development	5/77	288/18862	0.00647279	0.0571044	0.0443632	NA/NA/NA/NA/NA	5
BP	GO:0036151	phosphatidylcholine acyl-chain remodeling	2/77	30/18862	0.0066449	0.0581063	0.0451416	PLA2G2A/PLA2G5	2				BP	GO:0036151	phosphatidylcholine acyl-chain remodeling	2/77	30/18862	0.0066449	0.0581063	0.0451416	NA/NA	2
BP	GO:0071295	cellular response to vitamin	2/77	30/18862	0.0066449	0.0581063	0.0451416	POSTN/COL1A1	2				BP	GO:0071295	cellular response to vitamin	2/77	30/18862	0.0066449	0.0581063	0.0451416	NA/NA	2
BP	GO:1904035	regulation of epithelial cell apoptotic process	3/77	94/18862	0.0067186	0.0584114	0.0453786	SERPINE1/THBS1/H19	3				BP	GO:1904035	regulation of epithelial cell apoptotic process	3/77	94/18862	0.0067186	0.0584114	0.0453786	NA/NA/NA	3
BP	GO:0048568	embryonic organ development	6/77	412/18862	0.00673864	0.0584114	0.0453786	HOXA5/CTHRC1/TGFB2/LIF/HOXD9/IGF2	6				BP	GO:0048568	embryonic organ development	6/77	412/18862	0.00673864	0.0584114	0.0453786	NA/NA/NA/NA/NA/NA	6
BP	GO:0002040	sprouting angiogenesis	4/77	184/18862	0.00681914	0.0588521	0.045721	ANXA1/THBS1/SRPX2/MEOX2	4				BP	GO:0002040	sprouting angiogenesis	4/77	184/18862	0.00681914	0.0588521	0.045721	NA/NA/NA/NA	4
BP	GO:0001763	morphogenesis of a branching structure	4/77	186/18862	0.00707973	0.0598414	0.0464895	HOXA5/COL4A1/NPNT/MET	4				BP	GO:0001763	morphogenesis of a branching structure	4/77	186/18862	0.00707973	0.0598414	0.0464895	NA/NA/NA/NA	4
BP	GO:0001516	prostaglandin biosynthetic process	2/77	31/18862	0.0070845	0.0598414	0.0464895	ANXA1/FABP5	2				BP	GO:0001516	prostaglandin biosynthetic process	2/77	31/18862	0.0070845	0.0598414	0.0464895	NA/NA	2
BP	GO:0044788	modulation by host of viral process	2/77	31/18862	0.0070845	0.0598414	0.0464895	PTX3/LTF	2				BP	GO:0044788	modulation by host of viral process	2/77	31/18862	0.0070845	0.0598414	0.0464895	NA/NA	2
BP	GO:0045920	negative regulation of exocytosis	2/77	31/18862	0.0070845	0.0598414	0.0464895	ANXA1/IL13RA2	2				BP	GO:0045920	negative regulation of exocytosis	2/77	31/18862	0.0070845	0.0598414	0.0464895	NA/NA	2
BP	GO:0046457	prostanoid biosynthetic process	2/77	31/18862	0.0070845	0.0598414	0.0464895	ANXA1/FABP5	2				BP	GO:0046457	prostanoid biosynthetic process	2/77	31/18862	0.0070845	0.0598414	0.0464895	NA/NA	2
BP	GO:0007162	negative regulation of cell adhesion	5/77	295/18862	0.00714614	0.0601063	0.0466954	SERPINE1/ANXA1/POSTN/COL1A1/THBS1	5				BP	GO:0007162	negative regulation of cell adhesion	5/77	295/18862	0.00714614	0.0601063	0.0466954	NA/NA/NA/NA/NA	5
BP	GO:0060541	respiratory system development	4/77	188/18862	0.00734684	0.0615336	0.0478042	HOXA5/PDPN/CHI3L1/LIF	4				BP	GO:0060541	respiratory system development	4/77	188/18862	0.00734684	0.0615336	0.0478042	NA/NA/NA/NA	4
BP	GO:0010743	regulation of macrophage derived foam cell differentiation	2/77	32/18862	0.00753693	0.0623367	0.0484281	PLA2G2A/PLA2G5	2				BP	GO:0010743	regulation of macrophage derived foam cell differentiation	2/77	32/18862	0.00753693	0.0623367	0.0484281	NA/NA	2
BP	GO:0033687	osteoblast proliferation	2/77	32/18862	0.00753693	0.0623367	0.0484281	CTHRC1/LTF	2				BP	GO:0033687	osteoblast proliferation	2/77	32/18862	0.00753693	0.0623367	0.0484281	NA/NA	2
BP	GO:0035767	endothelial cell chemotaxis	2/77	32/18862	0.00753693	0.0623367	0.0484281	THBS1/MET	2				BP	GO:0035767	endothelial cell chemotaxis	2/77	32/18862	0.00753693	0.0623367	0.0484281	NA/NA	2
BP	GO:0042102	positive regulation of T cell proliferation	3/77	99/18862	0.00774836	0.0636607	0.0494567	IGFBP2/ANXA1/IGF2	3				BP	GO:0042102	positive regulation of T cell proliferation	3/77	99/18862	0.00774836	0.0636607	0.0494567	NA/NA/NA	3
BP	GO:0070372	regulation of ERK1 and ERK2 cascade	5/77	301/18862	0.00776116	0.0636607	0.0494567	PLA2G2A/NPNT/PLA2G5/CHI3L1/LIF	5				BP	GO:0070372	regulation of ERK1 and ERK2 cascade	5/77	301/18862	0.00776116	0.0636607	0.0494567	NA/NA/NA/NA/NA	5
BP	GO:0052548	regulation of endopeptidase activity	6/77	426/18862	0.00788472	0.0642754	0.0499342	SERPINE1/LTF/THBS1/SERPINA5/TIMP1/MMP9	6				BP	GO:0052548	regulation of endopeptidase activity	6/77	426/18862	0.00788472	0.0642754	0.0499342	NA/NA/NA/NA/NA/NA	6
BP	GO:0031099	regeneration	4/77	192/18862	0.00790086	0.0642754	0.0499342	ANXA1/NNMT/POSTN/LGR6	4				BP	GO:0031099	regeneration	4/77	192/18862	0.00790086	0.0642754	0.0499342	NA/NA/NA/NA	4
BP	GO:0034368	protein-lipid complex remodeling	2/77	33/18862	0.00800211	0.0643084	0.0499599	PLA2G2A/PLA2G5	2				BP	GO:0034368	protein-lipid complex remodeling	2/77	33/18862	0.00800211	0.0643084	0.0499599	NA/NA	2
BP	GO:0034369	plasma lipoprotein particle remodeling	2/77	33/18862	0.00800211	0.0643084	0.0499599	PLA2G2A/PLA2G5	2				BP	GO:0034369	plasma lipoprotein particle remodeling	2/77	33/18862	0.00800211	0.0643084	0.0499599	NA/NA	2
BP	GO:0042339	keratan sulfate metabolic process	2/77	33/18862	0.00800211	0.0643084	0.0499599	FMOD/LUM	2				BP	GO:0042339	keratan sulfate metabolic process	2/77	33/18862	0.00800211	0.0643084	0.0499599	NA/NA	2
CC	GO:0062023	collagen-containing extracellular matrix	22/77	423/19520	4.84785e-19	7.56264e-17	6.1236e-17	COL3A1/SERPINE1/COL4A1/CTHRC1/COL4A2/TGFB2/ANXA1/NPNT/FMOD/POSTN/LUM/COL1A1/GDF15/THBS1/SERPINA5/SRPX2/EMILIN3/COL6A2/COL1A2/TIMP1/COL5A1/MMP9	22				CC	GO:0062023	collagen-containing extracellular matrix	22/77	423/19520	4.84785e-19	7.56264e-17	6.1236e-17	NA/NA/NA/NA/NA/NA/NA/NA/NA/NA/NA/NA/NA/NA/NA/NA/NA/NA/NA/NA/NA/NA	22
CC	GO:0098644	complex of collagen trimers	7/77	21/19520	1.25029e-12	9.75225e-11	7.89656e-11	COL3A1/COL4A1/COL4A2/LUM/COL1A1/COL1A2/COL5A1	7				CC	GO:0098644	complex of collagen trimers	7/77	21/19520	1.25029e-12	9.75225e-11	7.89656e-11	NA/NA/NA/NA/NA/NA/NA	7
CC	GO:0005581	collagen trimer	9/77	87/19520	5.72146e-11	2.97516e-09	2.40903e-09	COL3A1/COL4A1/CTHRC1/COL4A2/LUM/COL1A1/COL6A2/COL1A2/COL5A1	9				CC	GO:0005581	collagen trimer	9/77	87/19520	5.72146e-11	2.97516e-09	2.40903e-09	NA/NA/NA/NA/NA/NA/NA/NA/NA	9
CC	GO:0005583	fibrillar collagen trimer	5/77	12/19520	6.48797e-10	2.02425e-08	1.63907e-08	COL3A1/LUM/COL1A1/COL1A2/COL5A1	5				CC	GO:0005583	fibrillar collagen trimer	5/77	12/19520	6.48797e-10	2.02425e-08	1.63907e-08	NA/NA/NA/NA/NA	5
CC	GO:0098643	banded collagen fibril	5/77	12/19520	6.48797e-10	2.02425e-08	1.63907e-08	COL3A1/LUM/COL1A1/COL1A2/COL5A1	5				CC	GO:0098643	banded collagen fibril	5/77	12/19520	6.48797e-10	2.02425e-08	1.63907e-08	NA/NA/NA/NA/NA	5
CC	GO:0034774	secretory granule lumen	10/77	322/19520	5.35433e-07	1.23554e-05	1.00044e-05	SERPINE1/TGFB2/PTX3/CHI3L1/TTR/LTF/THBS1/TIMP1/IGF2/FABP5	10				CC	GO:0034774	secretory granule lumen	10/77	322/19520	5.35433e-07	1.23554e-05	1.00044e-05	NA/NA/NA/NA/NA/NA/NA/NA/NA/NA	10
CC	GO:0060205	cytoplasmic vesicle lumen	10/77	326/19520	5.99264e-07	1.23554e-05	1.00044e-05	SERPINE1/TGFB2/PTX3/CHI3L1/TTR/LTF/THBS1/TIMP1/IGF2/FABP5	10				CC	GO:0060205	cytoplasmic vesicle lumen	10/77	326/19520	5.99264e-07	1.23554e-05	1.00044e-05	NA/NA/NA/NA/NA/NA/NA/NA/NA/NA	10
CC	GO:0031983	vesicle lumen	10/77	328/19520	6.3361e-07	1.23554e-05	1.00044e-05	SERPINE1/TGFB2/PTX3/CHI3L1/TTR/LTF/THBS1/TIMP1/IGF2/FABP5	10				CC	GO:0031983	vesicle lumen	10/77	328/19520	6.3361e-07	1.23554e-05	1.00044e-05	NA/NA/NA/NA/NA/NA/NA/NA/NA/NA	10
CC	GO:0031091	platelet alpha granule	6/77	91/19520	1.57888e-06	2.73673e-05	2.21598e-05	SERPINE1/TGFB2/THBS1/SERPINA5/TIMP1/IGF2	6				CC	GO:0031091	platelet alpha granule	6/77	91/19520	1.57888e-06	2.73673e-05	2.21598e-05	NA/NA/NA/NA/NA/NA	6
CC	GO:0005788	endoplasmic reticulum lumen	9/77	306/19520	3.22183e-06	5.02605e-05	4.06968e-05	COL3A1/COL4A1/COL4A2/COL1A1/THBS1/COL6A2/COL1A2/TIMP1/COL5A1	9				CC	GO:0005788	endoplasmic reticulum lumen	9/77	306/19520	3.22183e-06	5.02605e-05	4.06968e-05	NA/NA/NA/NA/NA/NA/NA/NA/NA	9
CC	GO:0031093	platelet alpha granule lumen	5/77	67/19520	6.68062e-06	9.47433e-05	7.67152e-05	SERPINE1/TGFB2/THBS1/TIMP1/IGF2	5				CC	GO:0031093	platelet alpha granule lumen	5/77	67/19520	6.68062e-06	9.47433e-05	7.67152e-05	NA/NA/NA/NA/NA	5
CC	GO:1904724	tertiary granule lumen	4/77	55/19520	6.55235e-05	0.000851806	0.000689721	PTX3/LTF/TNFAIP6/MMP9	4				CC	GO:1904724	tertiary granule lumen	4/77	55/19520	6.55235e-05	0.000851806	0.000689721	NA/NA/NA/NA	4
CC	GO:0009897	external side of plasma membrane	8/77	402/19520	0.000183739	0.00220487	0.00178532	ANXA1/IGHM/IGHA1/IGHG4/THBS1/SERPINA5/IL13RA2/CXCL10	8				CC	GO:0009897	external side of plasma membrane	8/77	402/19520	0.000183739	0.00220487	0.00178532	NA/NA/NA/NA/NA/NA/NA/NA	8
CC	GO:0042571	immunoglobulin complex, circulating	4/77	77/19520	0.000243487	0.00271314	0.00219688	IGHM/IGHA1/IGHG4/JCHAIN	4				CC	GO:0042571	immunoglobulin complex, circulating	4/77	77/19520	0.000243487	0.00271314	0.00219688	NA/NA/NA/NA	4
CC	GO:0072562	blood microparticle	5/77	146/19520	0.000280115	0.0029132	0.00235887	IGLV3-21/IGHM/IGHA1/IGHG4/JCHAIN	5				CC	GO:0072562	blood microparticle	5/77	146/19520	0.000280115	0.0029132	0.00235887	NA/NA/NA/NA/NA	5
CC	GO:0070820	tertiary granule	5/77	164/19520	0.000477781	0.00452064	0.00366044	PTX3/PLAU/LTF/TNFAIP6/MMP9	5				CC	GO:0070820	tertiary granule	5/77	164/19520	0.000477781	0.00452064	0.00366044	NA/NA/NA/NA/NA	5
CC	GO:0019814	immunoglobulin complex	5/77	167/19520	0.000518916	0.00452064	0.00366044	IGLV3-21/IGHM/IGHA1/IGHG4/JCHAIN	5				CC	GO:0019814	immunoglobulin complex	5/77	167/19520	0.000518916	0.00452064	0.00366044	NA/NA/NA/NA/NA	5
CC	GO:0005604	basement membrane	4/77	94/19520	0.000521613	0.00452064	0.00366044	COL4A1/COL4A2/TIMP1/COL5A1	4				CC	GO:0005604	basement membrane	4/77	94/19520	0.000521613	0.00452064	0.00366044	NA/NA/NA/NA	4
CC	GO:0035580	specific granule lumen	3/77	62/19520	0.00188829	0.0152141	0.0123191	PTX3/CHI3L1/LTF	3				CC	GO:0035580	specific granule lumen	3/77	62/19520	0.00188829	0.0152141	0.0123191	NA/NA/NA	3
CC	GO:0042383	sarcolemma	4/77	134/19520	0.00195053	0.0152141	0.0123191	ANXA1/COL6A2/FLNC/DES	4				CC	GO:0042383	sarcolemma	4/77	134/19520	0.00195053	0.0152141	0.0123191	NA/NA/NA/NA	4
CC	GO:0071682	endocytic vesicle lumen	2/77	20/19520	0.00278687	0.0207025	0.0167632	LTF/SAA1	2				CC	GO:0071682	endocytic vesicle lumen	2/77	20/19520	0.00278687	0.0207025	0.0167632	NA/NA	2
CC	GO:0042581	specific granule	4/77	160/19520	0.00369844	0.0262253	0.0212351	PTX3/CHI3L1/PLAU/LTF	4				CC	GO:0042581	specific granule	4/77	160/19520	0.00369844	0.0262253	0.0212351	NA/NA/NA/NA	4
CC	GO:0005775	vacuolar lumen	4/77	173/19520	0.00487859	0.0330896	0.0267932	FMOD/LUM/TTR/FABP5	4				CC	GO:0005775	vacuolar lumen	4/77	173/19520	0.00487859	0.0330896	0.0267932	NA/NA/NA/NA	4
MF	GO:0005201	extracellular matrix structural constituent	16/77	170/18337	1.21807e-17	2.46051e-15	1.94892e-15	COL3A1/COL4A1/CTHRC1/COL4A2/NPNT/FMOD/POSTN/LUM/CHI3L1/COL1A1/THBS1/SRPX2/EMILIN3/COL6A2/COL1A2/COL5A1	16				MF	GO:0005201	extracellular matrix structural constituent	16/77	170/18337	1.21807e-17	2.46051e-15	1.94892e-15	NA/NA/NA/NA/NA/NA/NA/NA/NA/NA/NA/NA/NA/NA/NA/NA	16
MF	GO:0030020	extracellular matrix structural constituent conferring tensile strength	7/77	41/18337	3.49241e-10	3.49017e-08	2.76449e-08	COL3A1/COL4A1/COL4A2/COL1A1/COL6A2/COL1A2/COL5A1	7				MF	GO:0030020	extracellular matrix structural constituent conferring tensile strength	7/77	41/18337	3.49241e-10	3.49017e-08	2.76449e-08	NA/NA/NA/NA/NA/NA/NA	7
MF	GO:0048407	platelet-derived growth factor binding	5/77	11/18337	5.18342e-10	3.49017e-08	2.76449e-08	COL3A1/COL4A1/COL1A1/COL1A2/COL5A1	5				MF	GO:0048407	platelet-derived growth factor binding	5/77	11/18337	5.18342e-10	3.49017e-08	2.76449e-08	NA/NA/NA/NA/NA	5
MF	GO:0005539	glycosaminoglycan binding	11/77	228/18337	2.80495e-09	1.4165e-07	1.12198e-07	IGHM/POSTN/LTF/THBS1/SAA1/SERPINA5/LGR6/COL5A1/CXCL10/TNFAIP6/JCHAIN	11				MF	GO:0005539	glycosaminoglycan binding	11/77	228/18337	2.80495e-09	1.4165e-07	1.12198e-07	NA/NA/NA/NA/NA/NA/NA/NA/NA/NA/NA	11
MF	GO:0019838	growth factor binding	9/77	137/18337	5.84e-09	2.35936e-07	1.8688e-07	IGFBP2/COL3A1/VASN/COL4A1/COL1A1/THBS1/SRPX2/COL1A2/COL5A1	9				MF	GO:0019838	growth factor binding	9/77	137/18337	5.84e-09	2.35936e-07	1.8688e-07	NA/NA/NA/NA/NA/NA/NA/NA/NA	9
MF	GO:0008201	heparin binding	8/77	164/18337	4.29918e-07	1.44739e-05	1.14645e-05	POSTN/LTF/THBS1/SAA1/SERPINA5/LGR6/COL5A1/CXCL10	8				MF	GO:0008201	heparin binding	8/77	164/18337	4.29918e-07	1.44739e-05	1.14645e-05	NA/NA/NA/NA/NA/NA/NA/NA	8
MF	GO:1901681	sulfur compound binding	8/77	260/18337	1.3263e-05	0.000382731	0.000303153	POSTN/LTF/THBS1/SAA1/SERPINA5/LGR6/COL5A1/CXCL10	8				MF	GO:1901681	sulfur compound binding	8/77	260/18337	1.3263e-05	0.000382731	0.000303153	NA/NA/NA/NA/NA/NA/NA/NA	8
MF	GO:0002020	protease binding	6/77	131/18337	1.85454e-05	0.000468272	0.000370909	COL3A1/SERPINE1/COL1A1/SERPINA5/COL1A2/TIMP1	6				MF	GO:0002020	protease binding	6/77	131/18337	1.85454e-05	0.000468272	0.000370909	NA/NA/NA/NA/NA/NA	6
MF	GO:0005178	integrin binding	6/77	142/18337	2.92728e-05	0.000657012	0.000520406	COL3A1/NPNT/THBS1/IGF2/IBSP/COL5A1	6				MF	GO:0005178	integrin binding	6/77	142/18337	2.92728e-05	0.000657012	0.000520406	NA/NA/NA/NA/NA/NA	6
MF	GO:0005518	collagen binding	4/77	68/18337	0.000190909	0.00385636	0.00305454	LUM/THBS1/COL6A2/MMP9	4				MF	GO:0005518	collagen binding	4/77	68/18337	0.000190909	0.00385636	0.00305454	NA/NA/NA/NA	4
MF	GO:0031210	phosphatidylcholine binding	3/77	31/18337	0.000294032	0.00494954	0.00392043	IGHM/SERPINA5/JCHAIN	3				MF	GO:0031210	phosphatidylcholine binding	3/77	31/18337	0.000294032	0.00494954	0.00392043	NA/NA/NA	3
MF	GO:0050997	quaternary ammonium group binding	3/77	31/18337	0.000294032	0.00494954	0.00392043	IGHM/SERPINA5/JCHAIN	3				MF	GO:0050997	quaternary ammonium group binding	3/77	31/18337	0.000294032	0.00494954	0.00392043	NA/NA/NA	3
MF	GO:0034987	immunoglobulin receptor binding	4/77	79/18337	0.000340146	0.00528535	0.00418642	IGHM/IGHA1/IGHG4/JCHAIN	4				MF	GO:0034987	immunoglobulin receptor binding	4/77	79/18337	0.000340146	0.00528535	0.00418642	NA/NA/NA/NA	4
MF	GO:0005501	retinoid binding	3/77	37/18337	0.000499143	0.00720192	0.00570449	RBP1/SERPINA5/FABP5	3				MF	GO:0005501	retinoid binding	3/77	37/18337	0.000499143	0.00720192	0.00570449	NA/NA/NA	3
MF	GO:0019840	isoprenoid binding	3/77	38/18337	0.000540295	0.00727597	0.00576315	RBP1/SERPINA5/FABP5	3				MF	GO:0019840	isoprenoid binding	3/77	38/18337	0.000540295	0.00727597	0.00576315	NA/NA/NA	3
MF	GO:0008083	growth factor activity	5/77	162/18337	0.000598709	0.0075587	0.00598709	TGFB2/GDF15/LIF/TIMP1/IGF2	5				MF	GO:0008083	growth factor activity	5/77	162/18337	0.000598709	0.0075587	0.00598709	NA/NA/NA/NA/NA	5
MF	GO:0003823	antigen binding	5/77	165/18337	0.000650612	0.0077308	0.00612341	IGLV3-21/IGHM/IGHA1/IGHG4/JCHAIN	5				MF	GO:0003823	antigen binding	5/77	165/18337	0.000650612	0.0077308	0.00612341	NA/NA/NA/NA/NA	5
MF	GO:0047498	calcium-dependent phospholipase A2 activity	2/77	16/18337	0.0020104	0.0225611	0.0178702	PLA2G2A/PLA2G5	2				MF	GO:0047498	calcium-dependent phospholipase A2 activity	2/77	16/18337	0.0020104	0.0225611	0.0178702	NA/NA	2
MF	GO:0042834	peptidoglycan binding	2/77	18/18337	0.00254936	0.026036	0.0206226	IGHM/JCHAIN	2				MF	GO:0042834	peptidoglycan binding	2/77	18/18337	0.00254936	0.026036	0.0206226	NA/NA	2
MF	GO:0019955	cytokine binding	4/77	136/18337	0.00257782	0.026036	0.0206226	PDPN/VASN/THBS1/IL13RA2	4				MF	GO:0019955	cytokine binding	4/77	136/18337	0.00257782	0.026036	0.0206226	NA/NA/NA/NA	4
MF	GO:0005543	phospholipid binding	7/77	451/18337	0.00284047	0.0273227	0.0216417	ANXA1/PLA2G2A/IGHM/PLA2G5/THBS1/SERPINA5/JCHAIN	7				MF	GO:0005543	phospholipid binding	7/77	451/18337	0.00284047	0.0273227	0.0216417	NA/NA/NA/NA/NA/NA/NA	7
MF	GO:0005125	cytokine activity	5/77	235/18337	0.00309469	0.0276539	0.0219041	TGFB2/GDF15/LIF/TIMP1/CXCL10	5				MF	GO:0005125	cytokine activity	5/77	235/18337	0.00309469	0.0276539	0.0219041	NA/NA/NA/NA/NA	5
MF	GO:0001972	retinoic acid binding	2/77	20/18337	0.00314871	0.0276539	0.0219041	SERPINA5/FABP5	2				MF	GO:0001972	retinoic acid binding	2/77	20/18337	0.00314871	0.0276539	0.0219041	NA/NA	2
MF	GO:0030021	extracellular matrix structural constituent conferring compression resistance	2/77	22/18337	0.00380744	0.0320459	0.0253829	FMOD/LUM	2				MF	GO:0030021	extracellular matrix structural constituent conferring compression resistance	2/77	22/18337	0.00380744	0.0320459	0.0253829	NA/NA	2
MF	GO:0048018	receptor ligand activity	7/77	486/18337	0.00428115	0.0342315	0.027114	TGFB2/GDF15/TTR/LIF/TIMP1/IGF2/CXCL10	7				MF	GO:0048018	receptor ligand activity	7/77	486/18337	0.00428115	0.0342315	0.027114	NA/NA/NA/NA/NA/NA/NA	7
MF	GO:0050431	transforming growth factor beta binding	2/77	24/18337	0.00452452	0.0342315	0.027114	VASN/THBS1	2				MF	GO:0050431	transforming growth factor beta binding	2/77	24/18337	0.00452452	0.0342315	0.027114	NA/NA	2
MF	GO:0030546	signaling receptor activator activity	7/77	492/18337	0.00457549	0.0342315	0.027114	TGFB2/GDF15/TTR/LIF/TIMP1/IGF2/CXCL10	7				MF	GO:0030546	signaling receptor activator activity	7/77	492/18337	0.00457549	0.0342315	0.027114	NA/NA/NA/NA/NA/NA/NA	7
MF	GO:0102567	phospholipase A2 activity (consuming 1,2-dipalmitoylphosphatidylcholine)	2/77	26/18337	0.00529897	0.0368607	0.0291966	PLA2G2A/PLA2G5	2				MF	GO:0102567	phospholipase A2 activity (consuming 1,2-dipalmitoylphosphatidylcholine)	2/77	26/18337	0.00529897	0.0368607	0.0291966	NA/NA	2
MF	GO:0102568	phospholipase A2 activity consuming 1,2-dioleoylphosphatidylethanolamine)	2/77	26/18337	0.00529897	0.0368607	0.0291966	PLA2G2A/PLA2G5	2				MF	GO:0102568	phospholipase A2 activity consuming 1,2-dioleoylphosphatidylethanolamine)	2/77	26/18337	0.00529897	0.0368607	0.0291966	NA/NA	2
MF	GO:0004252	serine-type endopeptidase activity	4/77	168/18337	0.00547436	0.0368607	0.0291966	PLAU/LTF/MMP9/PLAT	4				MF	GO:0004252	serine-type endopeptidase activity	4/77	168/18337	0.00547436	0.0368607	0.0291966	NA/NA/NA/NA	4
MF	GO:0004866	endopeptidase inhibitor activity	4/77	180/18337	0.0069644	0.0453809	0.0359453	SERPINE1/LTF/SERPINA5/TIMP1	4				MF	GO:0004866	endopeptidase inhibitor activity	4/77	180/18337	0.0069644	0.0453809	0.0359453	NA/NA/NA/NA	4
MF	GO:0008236	serine-type peptidase activity	4/77	186/18337	0.00780101	0.0480876	0.0380892	PLAU/LTF/MMP9/PLAT	4				MF	GO:0008236	serine-type peptidase activity	4/77	186/18337	0.00780101	0.0480876	0.0380892	NA/NA/NA/NA	4
MF	GO:0030414	peptidase inhibitor activity	4/77	187/18337	0.00794659	0.0480876	0.0380892	SERPINE1/LTF/SERPINA5/TIMP1	4				MF	GO:0030414	peptidase inhibitor activity	4/77	187/18337	0.00794659	0.0480876	0.0380892	NA/NA/NA/NA	4
MF	GO:0017171	serine hydrolase activity	4/77	188/18337	0.00809395	0.0480876	0.0380892	PLAU/LTF/MMP9/PLAT	4				MF	GO:0017171	serine hydrolase activity	4/77	188/18337	0.00809395	0.0480876	0.0380892	NA/NA/NA/NA	4
MF	GO:0004623	phospholipase A2 activity	2/77	33/18337	0.00844712	0.0487519	0.0386154	PLA2G2A/PLA2G5	2				MF	GO:0004623	phospholipase A2 activity	2/77	33/18337	0.00844712	0.0487519	0.0386154	NA/NA	2
MF	GO:0061135	endopeptidase regulator activity	4/77	192/18337	0.00870133	0.0488241	0.0386726	SERPINE1/LTF/SERPINA5/TIMP1	4				MF	GO:0061135	endopeptidase regulator activity	4/77	192/18337	0.00870133	0.0488241	0.0386726	NA/NA/NA/NA	4
MF	GO:0043394	proteoglycan binding	2/77	36/18337	0.00999751	0.054581	0.0432325	THBS1/COL5A1	2				MF	GO:0043394	proteoglycan binding	2/77	36/18337	0.00999751	0.054581	0.0432325	NA/NA	2
MF	GO:0043539	protein serine/threonine kinase activator activity	2/77	39/18337	0.0116641	0.0620037	0.0491118	LTF/IGF2	2				MF	GO:0043539	protein serine/threonine kinase activator activity	2/77	39/18337	0.0116641	0.0620037	0.0491118	NA/NA	2
BP, biological process; CC, cellular component; MF, molecular function; GO, Gene Ontology; KEGG, Kyoto Encyclopedia of Genes and Genomes.
